# Supplementary material
Source: publisher figshare collection journal article supplement (https://iop.figshare.com/ndownloader/files/21008973)
Supplement: Supplementary file 1 [file 21008973]

## Sheet: Soil moisture (depth mm)
	Access tube Id				Total Water Content at depths of 100, 120, 140, 200
Date	AT	Type	Soil Series	TWC100	TWC120	TWC140	TWC160	TWC180	TWC200
2016-09-19	A60	Drainage-Woodland	Clareville	146.751	187.548	NA	NA	NA	NA
2016-09-19	A61	Drainage-Woodland	Clareville	127.857	157.234	184.474	NA	NA	NA
2016-09-19	A62	Drainage-Woodland	Clareville	145.701	178.968	208.463	NA	NA	NA
2016-09-19	A63	Drainage-Woodland	Clareville	158.697	194.471	NA	NA	NA	NA
2016-09-19	A33	Intercanopy	Miguel	NA	NA	NA	NA	NA	NA
2016-09-19	A16	Intercanopy	Miguel	184.108	220.218	NA	NA	NA	NA
2016-09-19	A10	Intercanopy	Miguel	158.216	192.995	225.662	251.662	279.662	307.662
2016-09-19	A8	Intercanopy	Miguel	154.563	190.85	222.848	248.848	276.848	304.848
2016-09-19	A11	Intercanopy	Miguel	143.412	179.083	211.969	237.969	265.969	293.969
2016-09-19	A9	Intercanopy	Miguel	141.596	177.255	209.702	235.702	263.702	291.702
2016-09-19	A21	Intercanopy	Miguel	146.311	182.631	215.618	241.618	269.618	297.618
2016-09-19	A22	Intercanopy	Miguel	154.225	196.061	236.641	262.641	290.641	318.641
2016-09-19	A19	Intercanopy	Miguel	151.487	184.57	217.263	243.263	271.263	299.263
2016-09-19	A18	Intercanopy	Miguel	156.171	193.804	231.482	257.482	285.482	313.482
2016-09-19	A2	Intercanopy	Miguel	175.228	205.684	NA	NA	NA	NA
2016-09-19	A1	Intercanopy	Miguel	152.858	183.393	215.27	241.27	269.27	297.27
2016-09-19	A4	Intercanopy	Miguel	164.778	192.443	NA	NA	NA	NA
2016-09-19	A5	Intercanopy	Miguel	157.33	184.447	NA	NA	NA	NA
2016-09-19	A3	Intercanopy	Miguel	148.048	174.592	NA	NA	NA	NA
2016-09-19	A6	Intercanopy	Miguel	150.534	178.39	209.969	235.969	263.969	291.969
2016-09-19	A29	Grove	Saspamco	NA	NA	NA	NA	NA	NA
2016-09-19	A17	Grove	Saspamco	135.029	165.876	194.178	221.539	249.539	277.539
2016-09-19	A14	Cluster	Miguel	142.491	178.684	208.63	235.477	263.477	291.477
2016-09-19	A12	Cluster	Miguel	NA	NA	NA	NA	NA	NA
2016-09-19	A13	Cluster	Miguel	NA	NA	NA	NA	NA	NA
2016-09-19	A15	Cluster	Miguel	NA	NA	NA	NA	NA	NA
2016-09-19	A23	Grove	Saspamco	147.705	185.483	214.051	240.051	268.051	296.051
2016-09-19	A25	Cluster	Miguel	NA	NA	NA	NA	NA	NA
2016-09-19	A28	Cluster	Miguel	160.868	NA	NA	NA	NA	NA
2016-09-19	A24	Cluster	Miguel	163.16	197.194	225.637	251.637	279.637	307.637
2016-09-19	A7	Grove	Saspamco	125.152	152.273	NA	NA	NA	NA
2016-09-19	A27	Grove	Saspamco	141.693	177.886	205.638	231.638	259.638	287.638
2016-09-19	A30	Grove	Saspamco	129.662	161.5	188.944	214.944	242.944	270.944
2016-09-19	A26	Grove	Saspamco	144.248	177.66	205.713	234.664	262.832	290.999
2016-09-19	A100	Playa	Edroy	NA	NA	NA	NA	NA	NA
2016-09-19	A101	Playa	Edroy	NA	NA	NA	NA	NA	NA
2016-09-19	A102	Playa	Edroy	NA	NA	NA	NA	NA	NA
2016-09-19	A700	Playa	Edroy	192.633	231.367	269.532	NA	NA	NA
2016-09-19	A701	Playa	Edroy	197.435	229.071	254.609	278.408	NA	NA
2016-09-19	A702	Playa	Edroy	200.93	238.282	273.02	NA	NA	NA
2016-09-19	A703	Playa	Edroy	222.629	259.441	293.305	321.778	354.852	387.925
2016-09-19	A704	Playa	Edroy	186.125	222.57	257.525	297.923	NA	NA
2016-09-19	A300	Playa	Edroy	285.827	324.743	362.765	NA	NA	NA
2016-09-19	A301	Playa	Edroy	251.898	290.218	327.908	363.529	NA	NA
2016-09-19	A302	Playa	Edroy	245.917	288.615	329.914	368.023	NA	NA
2016-09-28	A60	Drainage-Woodland	Clareville	165.637	204.461	NA	NA	NA	NA
2016-09-28	A61	Drainage-Woodland	Clareville	149.631	178.335	205.843	NA	NA	NA
2016-09-28	A62	Drainage-Woodland	Clareville	163.378	196.037	226.375	NA	NA	NA
2016-09-28	A63	Drainage-Woodland	Clareville	177.102	214.38	NA	NA	NA	NA
2016-09-28	A33	Intercanopy	Miguel	NA	NA	NA	NA	NA	NA
2016-09-28	A16	Intercanopy	Miguel	NA	NA	NA	NA	NA	NA
2016-09-28	A10	Intercanopy	Miguel	213.036	253.65	291.605	319.605	346.605	373.605
2016-09-28	A8	Intercanopy	Miguel	187.853	230.591	263.035	291.035	318.035	345.035
2016-09-28	A11	Intercanopy	Miguel	181.909	220.025	251.803	279.803	306.803	333.803
2016-09-28	A9	Intercanopy	Miguel	158.914	198.324	234.647	262.647	289.647	316.647
2016-09-28	A21	Intercanopy	Miguel	NA	NA	NA	NA	NA	NA
2016-09-28	A22	Intercanopy	Miguel	NA	NA	NA	NA	NA	NA
2016-09-28	A19	Intercanopy	Miguel	173.42	208.325	240.306	268.306	295.306	322.306
2016-09-28	A18	Intercanopy	Miguel	184.932	223.921	262.391	290.391	317.391	344.391
2016-09-28	A2	Intercanopy	Miguel	197.859	227.45	NA	NA	NA	NA
2016-09-28	A1	Intercanopy	Miguel	174.161	204.728	NA	NA	NA	NA
2016-09-28	A4	Intercanopy	Miguel	180.494	205.272	NA	NA	NA	NA
2016-09-28	A5	Intercanopy	Miguel	184.347	210.437	NA	NA	NA	NA
2016-09-28	A3	Intercanopy	Miguel	172.638	199.315	NA	NA	NA	NA
2016-09-28	A6	Intercanopy	Miguel	172.011	200.689	NA	NA	NA	NA
2016-09-28	A29	Grove	Saspamco	NA	NA	NA	NA	NA	NA
2016-09-28	A17	Grove	Saspamco	167.939	200.627	229.904	258.297	285.297	312.297
2016-09-28	A14	Cluster	Miguel	166.794	203.981	236.882	265.052	292.933	320.813
2016-09-28	A12	Cluster	Miguel	NA	NA	NA	NA	NA	NA
2016-09-28	A13	Cluster	Miguel	NA	NA	NA	NA	NA	NA
2016-09-28	A15	Cluster	Miguel	NA	NA	NA	NA	NA	NA
2016-09-28	A23	Grove	Saspamco	171.115	207.212	246.479	274.479	301.479	328.479
2016-09-28	A25	Cluster	Miguel	NA	NA	NA	NA	NA	NA
2016-09-28	A28	Cluster	Miguel	195.472	NA	NA	NA	NA	NA
2016-09-28	A24	Cluster	Miguel	NA	NA	NA	NA	NA	NA
2016-09-28	A7	Grove	Saspamco	149.573	179.375	209.375	237.375	264.375	291.375
2016-09-28	A27	Grove	Saspamco	175.948	214.594	244.594	272.594	299.594	326.594
2016-09-28	A30	Grove	Saspamco	156.708	189.135	219.135	247.135	274.135	301.135
2016-09-28	A26	Grove	Saspamco	166.194	202.405	232.679	260.846	287.846	314.846
2016-09-28	A100	Playa	Edroy	NA	NA	NA	NA	NA	NA
2016-09-28	A101	Playa	Edroy	NA	NA	NA	NA	NA	NA
2016-09-28	A102	Playa	Edroy	NA	NA	NA	NA	NA	NA
2016-09-28	A700	Playa	Edroy	240.872	278.14	316.9	NA	NA	NA
2016-09-28	A701	Playa	Edroy	234.745	268.44	295.002	319.13	NA	NA
2016-09-28	A702	Playa	Edroy	240.294	278.353	314.401	353.451	NA	NA
2016-09-28	A703	Playa	Edroy	NA	NA	NA	NA	NA	NA
2016-09-28	A704	Playa	Edroy	NA	NA	NA	NA	NA	NA
2016-09-28	A300	Playa	Edroy	333.803	373.331	411.133	NA	NA	NA
2016-09-28	A301	Playa	Edroy	353.013	396.53	437.107	474.958	NA	NA
2016-09-28	A302	Playa	Edroy	349.954	395.225	436.701	475.713	NA	NA
2016-10-04	A60	Drainage-Woodland	Clareville	154.167	186.091	NA	NA	NA	NA
2016-10-04	A61	Drainage-Woodland	Clareville	132.161	159.931	188.156	NA	NA	NA
2016-10-04	A62	Drainage-Woodland	Clareville	146.75	178.657	211.033	NA	NA	NA
2016-10-04	A63	Drainage-Woodland	Clareville	166.314	200.511	NA	NA	NA	NA
2016-10-04	A33	Intercanopy	Miguel	203.692	233.805	NA	NA	NA	NA
2016-10-04	A16	Intercanopy	Miguel	NA	NA	NA	NA	NA	NA
2016-10-04	A10	Intercanopy	Miguel	169.823	205.737	239.427	266.427	293.427	320.427
2016-10-04	A8	Intercanopy	Miguel	162.735	201.044	233.071	260.071	287.071	314.071
2016-10-04	A11	Intercanopy	Miguel	158.96	195.381	227.387	254.387	281.387	308.387
2016-10-04	A9	Intercanopy	Miguel	152.953	189.052	222.052	252.2	279.2	306.2
2016-10-04	A21	Intercanopy	Miguel	150.585	187.416	220.035	247.035	274.035	301.035
2016-10-04	A22	Intercanopy	Miguel	154.812	193.288	230.052	257.052	284.052	311.052
2016-10-04	A19	Intercanopy	Miguel	156.588	190.348	223.401	250.401	277.401	304.401
2016-10-04	A18	Intercanopy	Miguel	168.126	206.245	243.114	275.947	302.947	329.947
2016-10-04	A2	Intercanopy	Miguel	187.898	216.742	247.742	274.742	301.742	328.742
2016-10-04	A1	Intercanopy	Miguel	166.49	194.822	NA	NA	NA	NA
2016-10-04	A4	Intercanopy	Miguel	170.8	198.12	NA	NA	NA	NA
2016-10-04	A5	Intercanopy	Miguel	172.708	200.819	NA	NA	NA	NA
2016-10-04	A3	Intercanopy	Miguel	164.301	189.197	NA	NA	NA	NA
2016-10-04	A6	Intercanopy	Miguel	165.816	189.366	NA	NA	NA	NA
2016-10-04	A29	Grove	Saspamco	148.442	178.44	206.44	235.301	264.758	294.216
2016-10-04	A17	Grove	Saspamco	158.523	192.643	220.643	247.643	274.643	301.643
2016-10-04	A14	Cluster	Miguel	154.307	190.808	221.85	248.978	277.364	305.749
2016-10-04	A12	Cluster	Miguel	154.208	191.505	226.297	255.299	282.299	309.299
2016-10-04	A13	Cluster	Miguel	160.282	201.226	236.337	266.133	293.133	320.133
2016-10-04	A15	Cluster	Miguel	151.232	191.271	226.584	257.506	284.506	311.506
2016-10-04	A23	Grove	Saspamco	157.919	192.83	220.83	247.83	274.83	301.83
2016-10-04	A25	Cluster	Miguel	183.366	222.693	259.395	286.395	313.395	340.395
2016-10-04	A28	Cluster	Miguel	181.141	NA	NA	NA	NA	NA
2016-10-04	A24	Cluster	Miguel	NA	NA	NA	NA	NA	NA
2016-10-04	A7	Grove	Saspamco	133.708	162.051	NA	NA	NA	NA
2016-10-04	A27	Grove	Saspamco	158.13	195.829	223.829	250.829	277.829	304.829
2016-10-04	A30	Grove	Saspamco	138.956	170.314	198.314	225.314	252.314	279.314
2016-10-04	A26	Grove	Saspamco	148.301	183.016	211.78	239.56	266.56	293.56
2016-10-04	A100	Playa	Edroy	266.64	305.913	344.726	381.933	419.058	456.183
2016-10-04	A101	Playa	Edroy	232.633	270.253	307.888	344.813	381.935	419.057
2016-10-04	A102	Playa	Edroy	236.34	273.96	311.595	348.52	385.642	422.764
2016-10-04	A700	Playa	Edroy	195.461	230.953	268.998	NA	NA	NA
2016-10-04	A701	Playa	Edroy	190.775	225.394	252.355	276.195	302.421	328.646
2016-10-04	A702	Playa	Edroy	197.967	235.44	271.307	309.66	NA	NA
2016-10-04	A703	Playa	Edroy	223.574	258.614	291.796	318.848	349.659	380.469
2016-10-04	A704	Playa	Edroy	253.258	290.611	325.886	354.563	NA	NA
2016-10-04	A300	Playa	Edroy	283.232	322.074	359.823	NA	NA	NA
2016-10-04	A301	Playa	Edroy	277.545	318.29	357.095	393.164	NA	NA
2016-10-04	A302	Playa	Edroy	NA	NA	NA	NA	NA	405.202
2016-10-24	A60	Drainage-Woodland	Clareville	137.012	175.051	NA	NA	NA	NA
2016-10-24	A61	Drainage-Woodland	Clareville	121.183	148.335	174.156	NA	NA	NA
2016-10-24	A62	Drainage-Woodland	Clareville	137.625	168.013	196.748	NA	NA	NA
2016-10-24	A63	Drainage-Woodland	Clareville	156.31	193.003	NA	NA	NA	NA
2016-10-24	A33	Intercanopy	Miguel	NA	NA	NA	NA	NA	NA
2016-10-24	A16	Intercanopy	Miguel	NA	NA	NA	NA	NA	NA
2016-10-24	A10	Intercanopy	Miguel	156.031	192.165	225.869	251.869	277.869	303.869
2016-10-24	A8	Intercanopy	Miguel	148.946	187.217	219.206	245.206	271.206	297.206
2016-10-24	A11	Intercanopy	Miguel	143.558	179.8	211.892	237.892	263.892	289.892
2016-10-24	A9	Intercanopy	Miguel	137.915	173.542	206.454	236.713	262.713	288.713
2016-10-24	A21	Intercanopy	Miguel	147.653	184.793	217.593	243.593	269.593	295.593
2016-10-24	A22	Intercanopy	Miguel	141.579	177.344	212.384	238.384	264.384	290.384
2016-10-24	A19	Intercanopy	Miguel	149.62	183.673	216.693	242.693	268.693	294.693
2016-10-24	A18	Intercanopy	Miguel	147.014	184.447	221.349	253.27	279.27	305.27
2016-10-24	A2	Intercanopy	Miguel	168.132	194.909	NA	NA	NA	NA
2016-10-24	A1	Intercanopy	Miguel	153.258	179.923	NA	NA	NA	NA
2016-10-24	A4	Intercanopy	Miguel	156.33	183.678	NA	NA	NA	NA
2016-10-24	A5	Intercanopy	Miguel	148.283	174.511	NA	NA	NA	NA
2016-10-24	A3	Intercanopy	Miguel	143.236	166.241	NA	NA	NA	NA
2016-10-24	A6	Intercanopy	Miguel	151.03	175.293	NA	NA	NA	NA
2016-10-24	A29	Grove	Saspamco	134.157	164.208	193.99	223.417	251.812	280.207
2016-10-24	A17	Grove	Saspamco	138.838	170.452	198.662	226.043	254.157	282.27
2016-10-24	A14	Cluster	Miguel	135.286	171.935	203.309	230.083	257.006	283.93
2016-10-24	A12	Cluster	Miguel	133.031	170.329	203.989	232.715	258.715	284.715
2016-10-24	A13	Cluster	Miguel	136.265	176.192	211.27	240.436	266.436	292.436
2016-10-24	A15	Cluster	Miguel	128.306	167.362	202.881	233.574	259.574	285.574
2016-10-24	A23	Grove	Saspamco	130.49	163.859	191.859	217.859	243.859	269.859
2016-10-24	A25	Cluster	Miguel	159.851	199.027	235.551	261.551	287.551	313.551
2016-10-24	A28	Cluster	Miguel	156.591	NA	NA	NA	NA	NA
2016-10-24	A24	Cluster	Miguel	145.188	177.915	205.85	231.85	257.85	283.85
2016-10-24	A7	Grove	Saspamco	117.85	145.959	NA	NA	NA	NA
2016-10-24	A27	Grove	Saspamco	140.586	178.2	206.2	232.2	258.2	284.2
2016-10-24	A30	Grove	Saspamco	123.446	154.59	182.59	208.59	234.59	260.59
2016-10-24	A26	Grove	Saspamco	135.573	169.646	197.795	226.09	252.09	278.09
2016-10-24	A100	Playa	Edroy	196.914	235.803	273.884	311.137	350.062	388.986
2016-10-24	A101	Playa	Edroy	227.844	265.112	302.448	338.687	375.17	411.653
2016-10-24	A102	Playa	Edroy	213.535	250.253	286.788	323.429	360.243	397.057
2016-10-24	A700	Playa	Edroy	178.342	214.819	252.908	NA	NA	NA
2016-10-24	A701	Playa	Edroy	180.018	212.558	238.112	261.803	NA	NA
2016-10-24	A702	Playa	Edroy	183.903	220.3	255.47	NA	NA	NA
2016-10-24	A703	Playa	Edroy	NA	NA	NA	NA	NA	326.789
2016-10-24	A704	Playa	Edroy	NA	NA	NA	NA	NA	NA
2016-10-24	A300	Playa	Edroy	234.657	272.828	310.17	NA	NA	NA
2016-10-24	A301	Playa	Edroy	239.52	278.36	316.276	NA	NA	NA
2016-10-24	A302	Playa	Edroy	186.253	224.389	262.484	299.717	334.684	369.652
2016-11-04	A60	Drainage-Woodland	Clareville	154.211	192.839	NA	NA	NA	NA
2016-11-04	A61	Drainage-Woodland	Clareville	132.433	160.702	187.74	214.297	NA	NA
2016-11-04	A62	Drainage-Woodland	Clareville	146.665	178.59	207.964	234.547	NA	NA
2016-11-04	A63	Drainage-Woodland	Clareville	166.778	203.75	NA	NA	NA	NA
2016-11-04	A33	Intercanopy	Miguel	NA	NA	NA	NA	NA	NA
2016-11-04	A16	Intercanopy	Miguel	127.218	165.498	200.357	230.329	NA	NA
2016-11-04	A10	Intercanopy	Miguel	153.217	189.445	222.328	NA	NA	NA
2016-11-04	A8	Intercanopy	Miguel	146.683	184.019	215.958	NA	NA	NA
2016-11-04	A11	Intercanopy	Miguel	139.184	173.337	204.742	NA	NA	NA
2016-11-04	A9	Intercanopy	Miguel	136.356	171.932	205.202	235.218	NA	NA
2016-11-04	A21	Intercanopy	Miguel	145.818	182.723	215.374	NA	NA	NA
2016-11-04	A22	Intercanopy	Miguel	140.243	175.787	210.285	NA	NA	NA
2016-11-04	A19	Intercanopy	Miguel	146.906	182.195	215.489	247.926	NA	NA
2016-11-04	A18	Intercanopy	Miguel	143.681	180.853	217.277	248.65	NA	NA
2016-11-04	A2	Intercanopy	Miguel	157.447	NA	NA	NA	NA	NA
2016-11-04	A1	Intercanopy	Miguel	148.483	177.669	NA	NA	NA	NA
2016-11-04	A4	Intercanopy	Miguel	151.285	177.385	NA	NA	NA	NA
2016-11-04	A5	Intercanopy	Miguel	139.762	164.762	NA	NA	NA	NA
2016-11-04	A3	Intercanopy	Miguel	132.847	155.18	NA	NA	NA	NA
2016-11-04	A6	Intercanopy	Miguel	144.892	167.912	NA	NA	NA	NA
2016-11-04	A29	Grove	Saspamco	131.229	160.629	189.499	217.996	245.966	273.966
2016-11-04	A17	Grove	Saspamco	134.717	166.017	194.119	221.174	NA	NA
2016-11-04	A14	Cluster	Miguel	131.214	167.738	198.446	225.011	251.832	279.832
2016-11-04	A12	Cluster	Miguel	128.159	165.607	198.522	227.462	NA	NA
2016-11-04	A13	Cluster	Miguel	133.292	172.229	206.627	235.224	NA	NA
2016-11-04	A15	Cluster	Miguel	127.218	165.498	200.357	230.329	NA	NA
2016-11-04	A23	Grove	Saspamco	124.765	157.155	NA	NA	NA	NA
2016-11-04	A25	Cluster	Miguel	155.709	194.654	230.506	NA	NA	NA
2016-11-04	A28	Cluster	Miguel	152.508	NA	NA	NA	NA	NA
2016-11-04	A24	Cluster	Miguel	145.188	177.915	205.85	NA	NA	NA
2016-11-04	A7	Grove	Saspamco	114.001	146.001	NA	NA	NA	NA
2016-11-04	A27	Grove	Saspamco	136.13	173.161	209.274	NA	NA	NA
2016-11-04	A30	Grove	Saspamco	121.388	151.908	NA	NA	NA	NA
2016-11-04	A26	Grove	Saspamco	135.573	169.646	197.795	226.09	NA	NA
2016-11-04	A100	Playa	Edroy	200.458	239.268	276.639	313.573	354.019	394.465
2016-11-04	A101	Playa	Edroy	229.408	265.973	303.502	340.137	376.916	413.695
2016-11-04	A102	Playa	Edroy	216.805	253.56	290.981	327.645	365.025	402.405
2016-11-04	A700	Playa	Edroy	178.617	215.102	253.048	NA	NA	NA
2016-11-04	A701	Playa	Edroy	178.884	210.972	236.726	260.39	NA	NA
2016-11-04	A702	Playa	Edroy	191.457	226.29	258.777	284.818	318.176	351.534
2016-11-04	A703	Playa	Edroy	222.276	259.061	292.899	321.353	354.403	387.453
2016-11-04	A704	Playa	Edroy	185.808	222.226	257.155	297.522	NA	NA
2016-11-04	A300	Playa	Edroy	228.667	266.891	304.88	NA	NA	NA
2016-11-04	A301	Playa	Edroy	237.756	276.83	314.726	350.036	NA	NA
2016-11-04	A302	Playa	Edroy	182.531	220.87	259	296.368	331.15	365.933
2016-11-22	A60	Drainage-Woodland	Clareville	132.194	169.159	NA	NA	NA	NA
2016-11-22	A61	Drainage-Woodland	Clareville	119.885	146.233	171.27	NA	NA	NA
2016-11-22	A62	Drainage-Woodland	Clareville	133.127	162.41	190.719	NA	NA	NA
2016-11-22	A63	Drainage-Woodland	Clareville	153.53	189.667	NA	NA	NA	NA
2016-11-22	A33	Intercanopy	Miguel	NA	NA	NA	NA	NA	NA
2016-11-22	A16	Intercanopy	Miguel	156.204	193.192	224.192	253.192	279.192	305.192
2016-11-22	A10	Intercanopy	Miguel	154.229	190.165	223.561	252.561	278.561	304.561
2016-11-22	A8	Intercanopy	Miguel	145.429	182.888	214.701	242.701	268.701	294.701
2016-11-22	A11	Intercanopy	Miguel	139.646	175.37	206.823	234.823	260.823	286.823
2016-11-22	A9	Intercanopy	Miguel	139.938	175.894	208.249	238.323	264.323	290.323
2016-11-22	A21	Intercanopy	Miguel	147.232	184.212	216.935	244.935	270.935	296.935
2016-11-22	A22	Intercanopy	Miguel	138.6	173.366	208.09	239.735	265.735	291.735
2016-11-22	A19	Intercanopy	Miguel	147.913	181.63	214.285	242.285	268.285	294.285
2016-11-22	A18	Intercanopy	Miguel	144.739	181.68	218.064	249.505	275.505	301.505
2016-11-22	A2	Intercanopy	Miguel	156.516	182.516	NA	NA	NA	NA
2016-11-22	A1	Intercanopy	Miguel	148.258	177.073	208.073	236.073	262.073	288.073
2016-11-22	A4	Intercanopy	Miguel	151.096	178.096	NA	NA	NA	NA
2016-11-22	A5	Intercanopy	Miguel	137.78	161.78	NA	NA	NA	NA
2016-11-22	A3	Intercanopy	Miguel	129.042	150.042	NA	NA	NA	NA
2016-11-22	A6	Intercanopy	Miguel	144.813	167.813	NA	NA	NA	NA
2016-11-22	A29	Grove	Saspamco	132.045	161.456	189.855	218.953	247.126	275.299
2016-11-22	A17	Grove	Saspamco	136.554	167.533	195.723	222.956	248.956	274.956
2016-11-22	A14	Cluster	Miguel	131.724	168.464	199.732	226.484	253.368	280.253
2016-11-22	A12	Cluster	Miguel	129.566	166.914	199.879	228.169	254.169	280.169
2016-11-22	A13	Cluster	Miguel	134.866	174.217	208.311	237.557	263.557	289.557
2016-11-22	A15	Cluster	Miguel	128.096	166.534	201.447	232.101	258.101	284.101
2016-11-22	A23	Grove	Saspamco	125.629	158.32	185.32	213.32	239.32	265.32
2016-11-22	A25	Cluster	Miguel	156.761	195.559	231.551	259.551	285.551	311.551
2016-11-22	A28	Cluster	Miguel	150.952	NA	NA	NA	NA	NA
2016-11-22	A24	Cluster	Miguel	146.31	174.374	205.374	233.374	259.374	285.374
2016-11-22	A7	Grove	Saspamco	113.713	140.713	NA	NA	NA	NA
2016-11-22	A27	Grove	Saspamco	136.51	173.478	200.478	227.478	253.478	279.478
2016-11-22	A30	Grove	Saspamco	121.06	151.806	178.806	205.806	231.806	257.806
2016-11-22	A26	Grove	Saspamco	134.432	168.349	196.283	224.09	250.09	276.09
2016-11-22	A100	Playa	Edroy	198.496	237.001	274.389	310.778	351.211	391.645
2016-11-22	A101	Playa	Edroy	235.557	272.645	309.944	346.351	383.137	419.923
2016-11-22	A102	Playa	Edroy	215.468	252.462	289.362	326.312	363.779	401.246
2016-11-22	A700	Playa	Edroy	233.109	270.775	308.261	NA	NA	NA
2016-11-22	A701	Playa	Edroy	243.641	282.2	319.798	355.534	NA	NA
2016-11-22	A702	Playa	Edroy	189.339	227.568	265.573	303.218	338.523	373.828
2016-11-22	A703	Playa	Edroy	220.796	257.635	290.999	318.909	352.455	386.002
2016-11-22	A704	Playa	Edroy	188.544	223.833	256.244	282.601	NA	NA
2016-11-22	A300	Playa	Edroy	233.109	270.775	308.261	NA	NA	NA
2016-11-22	A301	Playa	Edroy	243.641	282.2	319.798	355.534	NA	NA
2016-11-22	A302	Playa	Edroy	189.339	227.568	265.573	303.218	338.523	373.828
2016-12-06	A60	Drainage-Woodland	Clareville	168.49	NA	NA	NA	NA	NA
2016-12-06	A61	Drainage-Woodland	Clareville	177.535	204.291	229.327	NA	NA	NA
2016-12-06	A62	Drainage-Woodland	Clareville	184.444	216.323	247.478	NA	NA	NA
2016-12-06	A63	Drainage-Woodland	Clareville	190.905	229.183	NA	NA	NA	NA
2016-12-06	A33	Intercanopy	Miguel	212.292	242.292	NA	NA	NA	NA
2016-12-06	A16	Intercanopy	Miguel	NA	NA	NA	NA	NA	NA
2016-12-06	A10	Intercanopy	Miguel	184.508	219.553	252.703	280.703	307.703	334.703
2016-12-06	A8	Intercanopy	Miguel	NA	NA	NA	NA	NA	NA
2016-12-06	A11	Intercanopy	Miguel	193.689	228.617	259.441	287.441	314.441	341.441
2016-12-06	A9	Intercanopy	Miguel	169.497	205.354	237.233	267.87	294.87	321.87
2016-12-06	A21	Intercanopy	Miguel	168.539	205.348	236.967	264.967	291.967	318.967
2016-12-06	A22	Intercanopy	Miguel	181.783	217.284	250.328	278.328	305.328	332.328
2016-12-06	A19	Intercanopy	Miguel	167.026	200.088	232.644	260.644	287.644	314.644
2016-12-06	A18	Intercanopy	Miguel	190.014	227.425	263.172	291.172	318.172	345.172
2016-12-06	A2	Intercanopy	Miguel	NA	NA	NA	NA	NA	NA
2016-12-06	A1	Intercanopy	Miguel	172.982	199.982	NA	NA	NA	NA
2016-12-06	A4	Intercanopy	Miguel	179.499	205.499	NA	NA	NA	NA
2016-12-06	A5	Intercanopy	Miguel	181.102	205.102	NA	NA	NA	NA
2016-12-06	A3	Intercanopy	Miguel	171.591	192.591	NA	NA	NA	NA
2016-12-06	A6	Intercanopy	Miguel	170.578	193.578	NA	NA	NA	NA
2016-12-06	A29	Grove	Saspamco	156.192	185.222	213.85	242.626	270.521	298.415
2016-12-06	A17	Grove	Saspamco	168.828	199.319	227.041	254.121	281.121	308.121
2016-12-06	A14	Cluster	Miguel	168.849	204.749	234.694	261.052	288.362	315.673
2016-12-06	A12	Cluster	Miguel	169.202	206.558	238.442	266.818	293.818	320.818
2016-12-06	A13	Cluster	Miguel	191.305	230.23	263.7	292.602	319.602	346.602
2016-12-06	A15	Cluster	Miguel	169.661	207.966	241.909	272.249	299.249	326.249
2016-12-06	A23	Grove	Saspamco	165.881	198.852	225.852	252.852	279.852	306.852
2016-12-06	A25	Cluster	Miguel	197.917	236.673	272.655	300.655	327.655	354.655
2016-12-06	A28	Cluster	Miguel	199.165	NA	NA	NA	NA	NA
2016-12-06	A24	Cluster	Miguel	191.893	223.123	250.792	278.792	305.792	332.792
2016-12-06	A7	Grove	Saspamco	184.751	216.751	NA	NA	NA	NA
2016-12-06	A27	Grove	Saspamco	181.55	217.825	244.825	271.825	298.825	325.825
2016-12-06	A30	Grove	Saspamco	159.909	190.712	217.712	244.712	271.712	298.712
2016-12-06	A26	Grove	Saspamco	178.006	210.286	237.478	265.292	292.292	319.292
2016-12-06	A100	Playa	Edroy	NA	NA	NA	NA	NA	NA
2016-12-06	A101	Playa	Edroy	NA	NA	NA	NA	NA	NA
2016-12-06	A102	Playa	Edroy	NA	NA	NA	NA	NA	NA
2016-12-06	A700	Playa	Edroy	242.641	277.46	315.548	355.598	NA	NA
2016-12-06	A701	Playa	Edroy	231.67	266.1	293.237	317.433	343.011	368.59
2016-12-06	A702	Playa	Edroy	249.07	286.001	321.488	357.157	NA	NA
2016-12-06	A703	Playa	Edroy	349.011	392.45	429.592	462.097	NA	NA
2016-12-06	A704	Playa	Edroy	NA	NA	NA	NA	NA	NA
2016-12-06	A300	Playa	Edroy	NA	NA	NA	NA	NA	NA
2016-12-06	A301	Playa	Edroy	NA	NA	NA	NA	NA	NA
2016-12-06	A302	Playa	Edroy	NA	NA	NA	NA	NA	NA
2016-12-16	A60	Drainage-Woodland	Clareville	180.816	NA	NA	NA	NA	NA
2016-12-16	A61	Drainage-Woodland	Clareville	170.592	213.331	240.647	NA	NA	NA
2016-12-16	A62	Drainage-Woodland	Clareville	178.1	210.5	241.363	NA	NA	NA
2016-12-16	A63	Drainage-Woodland	Clareville	188.128	226.384	NA	NA	NA	NA
2016-12-16	A33	Intercanopy	Miguel	NA	NA	NA	NA	NA	NA
2016-12-16	A16	Intercanopy	Miguel	249.475	295.131	326.131	353.131	380.131	407.131
2016-12-16	A10	Intercanopy	Miguel	173.746	214.262	253.253	265.153	292.153	319.153
2016-12-16	A8	Intercanopy	Miguel	194.774	237.362	275.441	302.441	329.441	356.441
2016-12-16	A11	Intercanopy	Miguel	185.22	218.672	248.254	275.254	302.254	329.254
2016-12-16	A9	Intercanopy	Miguel	219.091	263.43	294.43	321.43	348.43	375.43
2016-12-16	A21	Intercanopy	Miguel	183.168	222.665	258.808	285.808	312.808	339.808
2016-12-16	A22	Intercanopy	Miguel	187.723	229.366	267.671	294.671	321.671	348.671
2016-12-16	A19	Intercanopy	Miguel	189.134	225.907	262.521	289.521	316.521	343.521
2016-12-16	A18	Intercanopy	Miguel	214.362	256.63	296.668	330.847	357.847	384.847
2016-12-16	A2	Intercanopy	Miguel	NA	NA	NA	NA	NA	NA
2016-12-16	A1	Intercanopy	Miguel	172.097	200.799	231.799	258.799	285.799	312.799
2016-12-16	A4	Intercanopy	Miguel	178.232	206.232	NA	NA	NA	NA
2016-12-16	A5	Intercanopy	Miguel	180.085	205.085	NA	NA	NA	NA
2016-12-16	A3	Intercanopy	Miguel	171.414	197.414	NA	NA	NA	NA
2016-12-16	A6	Intercanopy	Miguel	173.819	196.819	NA	NA	NA	NA
2016-12-16	A29	Grove	Saspamco	156.047	185.587	214.784	244.321	273.168	302.016
2016-12-16	A17	Grove	Saspamco	164.293	194.264	221.527	248.281	275.281	302.281
2016-12-16	A14	Cluster	Miguel	166.263	202.229	232.663	259.664	287.117	314.571
2016-12-16	A12	Cluster	Miguel	167.45	204.295	235.855	265.718	292.718	319.718
2016-12-16	A13	Cluster	Miguel	186.043	226.205	260.389	290.291	317.291	344.291
2016-12-16	A15	Cluster	Miguel	169.144	208.049	242.696	273.79	304.053	334.316
2016-12-16	A23	Grove	Saspamco	165.133	199.439	226.439	254.439	281.439	308.439
2016-12-16	A25	Cluster	Miguel	205.259	247.128	289.361	316.361	343.361	370.361
2016-12-16	A28	Cluster	Miguel	243.488	NA	NA	NA	NA	NA
2016-12-16	A24	Cluster	Miguel	241.546	287.475	330.528	357.528	384.528	411.528
2016-12-16	A7	Grove	Saspamco	168.37	203.37	NA	NA	NA	NA
2016-12-16	A27	Grove	Saspamco	177.34	213.769	240.769	268.769	295.769	322.769
2016-12-16	A30	Grove	Saspamco	155.62	186.682	213.682	241.682	268.682	295.682
2016-12-16	A26	Grove	Saspamco	168.397	201.139	228.38	256.618	283.618	310.618
2016-12-16	A100	Playa	Edroy	389.026	432.851	476.986	519.871	564.321	608.77
2016-12-16	A101	Playa	Edroy	399.419	445.499	489.667	531.556	574.193	616.83
2016-12-16	A102	Playa	Edroy	386.003	433.532	481.727	524.235	564.729	605.224
2016-12-16	A700	Playa	Edroy	341.173	385.746	433.589	483.913	NA	NA
2016-12-16	A701	Playa	Edroy	313.944	355.879	390.73	421.794	453.847	485.9
2016-12-16	A702	Playa	Edroy	279.89	322.147	363.192	405.009	NA	NA
2016-12-16	A703	Playa	Edroy	364.083	410.793	NA	NA	NA	NA
2016-12-16	A704	Playa	Edroy	339.808	382.943	421.951	455.361	497.525	539.688
2016-12-16	A300	Playa	Edroy	NA	NA	NA	NA	NA	NA
2016-12-16	A301	Playa	Edroy	NA	NA	NA	NA	NA	NA
2016-12-16	A302	Playa	Edroy	NA	NA	NA	NA	NA	NA
2017-01-04	A60	Drainage-Woodland	Clareville	162.44	NA	NA	NA	NA	NA
2017-01-04	A61	Drainage-Woodland	Clareville	135.558	162.124	187.638	NA	NA	NA
2017-01-04	A62	Drainage-Woodland	Clareville	150.096	181.145	210.572	NA	NA	NA
2017-01-04	A63	Drainage-Woodland	Clareville	171.659	209.634	NA	NA	NA	NA
2017-01-04	A33	Intercanopy	Miguel	169.297	197.297	NA	NA	NA	NA
2017-01-04	A16	Intercanopy	Miguel	159.31	188.281	209.281	230.281	251.281	272.281
2017-01-04	A10	Intercanopy	Miguel	136.243	165.848	193.263	214.263	235.263	256.263
2017-01-04	A8	Intercanopy	Miguel	125.979	158.836	186.203	207.203	228.203	249.203
2017-01-04	A11	Intercanopy	Miguel	136.243	165.848	193.263	214.263	235.263	256.263
2017-01-04	A9	Intercanopy	Miguel	122.489	152.209	178.628	202.827	223.827	244.827
2017-01-04	A21	Intercanopy	Miguel	126.186	156.333	182.508	203.508	224.508	245.508
2017-01-04	A22	Intercanopy	Miguel	122.345	152.005	180.689	201.689	222.689	243.689
2017-01-04	A19	Intercanopy	Miguel	124.903	150.508	173.842	194.842	215.842	236.842
2017-01-04	A18	Intercanopy	Miguel	139.322	170.1	200.021	225.84	246.84	267.84
2017-01-04	A2	Intercanopy	Miguel	NA	NA	NA	NA	NA	NA
2017-01-04	A1	Intercanopy	Miguel	136.828	159.162	180.162	201.162	222.162	243.162
2017-01-04	A4	Intercanopy	Miguel	148.458	173.458	NA	NA	NA	NA
2017-01-04	A5	Intercanopy	Miguel	140.868	165.868	NA	NA	NA	NA
2017-01-04	A3	Intercanopy	Miguel	130.643	153.643	NA	NA	NA	NA
2017-01-04	A6	Intercanopy	Miguel	134.685	157.685	NA	NA	NA	NA
2017-01-04	A29	Grove	Saspamco	113.938	137.116	159.127	181.9	203.646	225.391
2017-01-04	A17	Grove	Saspamco	123.943	147.188	173.388	196.831	217.831	238.831
2017-01-04	A14	Cluster	Miguel	134.71	164.146	188.215	208.729	229.356	249.983
2017-01-04	A12	Cluster	Miguel	125.811	155.23	180.094	200.852	221.852	242.852
2017-01-04	A13	Cluster	Miguel	NA	NA	NA	NA	NA	NA
2017-01-04	A15	Cluster	Miguel	NA	NA	NA	NA	NA	NA
2017-01-04	A23	Grove	Saspamco	NA	NA	NA	NA	NA	NA
2017-01-04	A25	Cluster	Miguel	149.574	180.425	201.425	222.425	243.425	264.425
2017-01-04	A28	Cluster	Miguel	135.072	NA	NA	NA	NA	NA
2017-01-04	A24	Cluster	Miguel	132.497	158.501	179.838	200.838	221.838	242.838
2017-01-04	A7	Grove	Saspamco	122.028	149.028	NA	NA	NA	NA
2017-01-04	A27	Grove	Saspamco	147.754	178.434	202.434	223.434	244.434	265.434
2017-01-04	A30	Grove	Saspamco	112.95	139.826	163.826	184.826	205.826	226.826
2017-01-04	A26	Grove	Saspamco	111.027	136.592	160.779	182.053	203.053	224.053
2017-01-04	A100	Playa	Edroy	319.141	361.309	404.058	443.161	488.877	534.592
2017-01-04	A101	Playa	Edroy	303.121	349.081	394.38	437.128	480.328	523.527
2017-01-04	A102	Playa	Edroy	293.467	344.36	392.11	438.92	484.971	531.021
2017-01-04	A700	Playa	Edroy	111.251	146.025	183.788	224.926	NA	NA
2017-01-04	A701	Playa	Edroy	77.8008	111.544	137.046	158.933	184.287	209.642
2017-01-04	A702	Playa	Edroy	116.813	153.561	188.05	192.349	NA	NA
2017-01-04	A703	Playa	Edroy	184.409	226.98	264.016	291.92	328.576	365.233
2017-01-04	A704	Playa	Edroy	204.042	238.175	271.915	295.693	327.439	359.185
2017-01-04	A300	Playa	Edroy	210.94	249.623	288.417	NA	NA	NA
2017-01-04	A301	Playa	Edroy	212.22	251.563	290.072	326.032	NA	NA
2017-01-04	A302	Playa	Edroy	NA	NA	NA	NA	NA	NA
2017-01-24	A60	Drainage-Woodland	Clareville	179.261	NA	NA	NA	NA	NA
2017-01-24	A61	Drainage-Woodland	Clareville	125.065	150.494	174.407	NA	NA	NA
2017-01-24	A62	Drainage-Woodland	Clareville	145.819	176.623	205.675	NA	NA	NA
2017-01-24	A63	Drainage-Woodland	Clareville	179.74	220.574	NA	NA	NA	NA
2017-01-24	A33	Intercanopy	Miguel	224.374	255.374	NA	NA	NA	NA
2017-01-24	A16	Intercanopy	Miguel	212.65	251.157	282.157	309.157	333.157	357.157
2017-01-24	A10	Intercanopy	Miguel	181.284	222.842	260.824	287.824	311.824	335.824
2017-01-24	A8	Intercanopy	Miguel	170.683	212.415	246.931	273.931	297.931	321.931
2017-01-24	A11	Intercanopy	Miguel	177.119	217.624	253.063	280.063	304.063	328.063
2017-01-24	A9	Intercanopy	Miguel	155.914	195.851	229.822	269.611	293.611	317.611
2017-01-24	A21	Intercanopy	Miguel	168.711	210.646	247.033	274.033	298.033	322.033
2017-01-24	A22	Intercanopy	Miguel	169.587	211.12	250.77	277.77	301.77	325.77
2017-01-24	A19	Intercanopy	Miguel	175.439	210.388	247.503	274.503	298.503	322.503
2017-01-24	A18	Intercanopy	Miguel	184.009	224.552	266.279	293.279	317.279	341.279
2017-01-24	A2	Intercanopy	Miguel	169.98	NA	NA	NA	NA	NA
2017-01-24	A1	Intercanopy	Miguel	183.175	214.366	NA	NA	NA	NA
2017-01-24	A4	Intercanopy	Miguel	172.456	203.456	NA	NA	NA	NA
2017-01-24	A5	Intercanopy	Miguel	191.948	221.948	NA	NA	NA	NA
2017-01-24	A3	Intercanopy	Miguel	178.342	208.342	NA	NA	NA	NA
2017-01-24	A6	Intercanopy	Miguel	188.757	218.757	NA	NA	NA	NA
2017-01-24	A29	Grove	Saspamco	148.284	180.892	211.651	243.493	274.577	305.662
2017-01-24	A17	Grove	Saspamco	152.596	184.794	213.111	240.42	264.42	288.42
2017-01-24	A14	Cluster	Miguel	160.662	200.587	232.776	259.662	284.64	309.619
2017-01-24	A12	Cluster	Miguel	165.698	206.985	241.713	271.063	295.063	319.063
2017-01-24	A13	Cluster	Miguel	179.197	223.739	261.231	293.322	317.322	341.322
2017-01-24	A15	Cluster	Miguel	168.893	212.03	250.313	285.045	309.045	333.045
2017-01-24	A23	Grove	Saspamco	170.018	207.717	238.717	265.717	289.717	313.717
2017-01-24	A25	Cluster	Miguel	203.128	246.257	286.22	313.22	337.22	361.22
2017-01-24	A28	Cluster	Miguel	196.277	NA	NA	NA	NA	NA
2017-01-24	A24	Cluster	Miguel	162.68	196.207	224.384	251.384	275.384	299.384
2017-01-24	A7	Grove	Saspamco	145.558	178.558	NA	NA	NA	NA
2017-01-24	A27	Grove	Saspamco	183.679	223.371	254.371	281.371	305.371	329.371
2017-01-24	A30	Grove	Saspamco	135.288	169.741	200.741	227.741	251.741	275.741
2017-01-24	A26	Grove	Saspamco	157.755	196.385	227.516	258.025	282.025	306.025
2017-01-24	A100	Playa	Edroy	241.706	281.985	322.606	361.924	405.134	448.343
2017-01-24	A101	Playa	Edroy	262.039	309.944	351.022	393.885	434.737	475.588
2017-01-24	A102	Playa	Edroy	235.808	282.726	326.735	369.094	411.287	453.48
2017-01-24	A700	Playa	Edroy	172.508	211.275	256.275	299.954	NA	NA
2017-01-24	A701	Playa	Edroy	149.202	189.271	220.481	246.909	275.705	304.501
2017-01-24	A702	Playa	Edroy	165.727	208.248	247.848	287.79	NA	NA
2017-01-24	A703	Playa	Edroy	258.654	303.398	342.34	373.062	417.348	461.634
2017-01-24	A704	Playa	Edroy	250.056	292.044	329.508	359.392	397.745	436.097
2017-01-24	A300	Playa	Edroy	262.101	305.636	349.563	NA	NA	NA
2017-01-24	A301	Playa	Edroy	276.536	321.347	365.847	407.263	NA	NA
2017-01-24	A302	Playa	Edroy	253.117	302.15	346.047	388.052	NA	NA
2017-02-06	A60	Drainage-Woodland	Clareville	148.552	182.483	NA	NA	NA	NA
2017-02-06	A61	Drainage-Woodland	Clareville	130.427	156.807	181.929	NA	NA	NA
2017-02-06	A62	Drainage-Woodland	Clareville	141.83	172.232	201.325	NA	NA	NA
2017-02-06	A63	Drainage-Woodland	Clareville	153.291	190.155	NA	NA	NA	NA
2017-02-06	A64	Drainage-Woodland	Clareville	NA	NA	NA	NA	NA	NA
2017-02-06	A65	Drainage-Woodland	Clareville	NA	NA	NA	NA	NA	NA
2017-02-06	A33	Intercanopy	Miguel	NA	NA	NA	NA	NA	NA
2017-02-06	A16	Intercanopy	Miguel	215.793	256.247	281.247	307.247	331.247	355.247
2017-02-06	A10	Intercanopy	Miguel	NA	NA	NA	NA	NA	NA
2017-02-06	A8	Intercanopy	Miguel	170.351	213.205	248.306	274.306	298.306	322.306
2017-02-06	A11	Intercanopy	Miguel	172.264	211.934	246.611	272.611	296.611	320.611
2017-02-06	A9	Intercanopy	Miguel	163.646	204.724	240.873	274.891	298.891	322.891
2017-02-06	A21	Intercanopy	Miguel	168.336	210.27	247.121	273.121	297.121	321.121
2017-02-06	A22	Intercanopy	Miguel	165.306	206.641	246.017	272.017	296.017	320.017
2017-02-06	A19	Intercanopy	Miguel	171.887	207.394	243.997	269.997	293.997	317.997
2017-02-06	A18	Intercanopy	Miguel	183.783	224.442	263.783	289.783	313.783	337.783
2017-02-06	A2	Intercanopy	Miguel	NA	NA	NA	NA	NA	NA
2017-02-06	A1	Intercanopy	Miguel	172.546	199.834	NA	NA	NA	NA
2017-02-06	A4	Intercanopy	Miguel	181.618	210.618	NA	NA	NA	NA
2017-02-06	A5	Intercanopy	Miguel	185.22	216.22	NA	NA	NA	NA
2017-02-06	A3	Intercanopy	Miguel	175.092	206.092	NA	NA	NA	NA
2017-02-06	A6	Intercanopy	Miguel	187.356	214.356	NA	NA	NA	NA
2017-02-06	A29	Grove	Saspamco	151.041	183.689	215.718	246.479	282.017	317.554
2017-02-06	A17	Grove	Saspamco	158.927	196.295	228.375	257.737	281.737	305.737
2017-02-06	A14	Cluster	Miguel	163.347	205.071	237.771	264.254	288.426	312.599
2017-02-06	A12	Cluster	Miguel	NA	NA	NA	NA	NA	NA
2017-02-06	A13	Cluster	Miguel	176.624	222.944	262.165	294.895	318.895	342.895
2017-02-06	A15	Cluster	Miguel	NA	NA	NA	NA	NA	NA
2017-02-06	A23	Grove	Saspamco	NA	NA	NA	NA	NA	NA
2017-02-06	A25	Cluster	Miguel	205.194	250.359	292.524	318.524	342.524	366.524
2017-02-06	A28	Cluster	Miguel	189.572	NA	NA	NA	NA	NA
2017-02-06	A24	Cluster	Miguel	156.83	188.306	213.779	239.779	263.779	287.779
2017-02-06	A7	Grove	Saspamco	149.449	182.449	NA	NA	NA	NA
2017-02-06	A27	Grove	Saspamco	168.473	211.622	236.622	262.622	286.622	310.622
2017-02-06	A30	Grove	Saspamco	131.212	165.517	190.517	216.517	240.517	264.517
2017-02-06	A26	Grove	Saspamco	155.084	193.064	223.963	254.353	278.353	302.353
2017-02-06	A32	Cluster	Saspamco	88.9751	107.79	127.495	148.21	168.925	189.627
2017-02-06	A34	Intercanopy	Miguel	NA	NA	NA	NA	NA	NA
2017-02-06	A31	Grove	Saspamco	113.711	136.745	162.475	193.883	218.77	242.117
2017-02-06	A35	Cluster	Miguel	207.561	248.926	285.066	319.135	349.281	375.798
2017-02-06	A100	Playa	Edroy	210.665	249.487	287.007	324.421	366.638	408.855
2017-02-06	A101	Playa	Edroy	154.548	193.469	230.562	265.943	302.113	338.283
2017-02-06	A102	Playa	Edroy	141.791	183.089	219.785	258.122	297.345	336.567
2017-02-06	A700	Playa	Edroy	112.666	147.359	185.403	224.785	NA	NA
2017-02-06	A701	Playa	Edroy	104.231	139.444	167.889	191.828	212.615	233.403
2017-02-06	A702	Playa	Edroy	104.887	142.404	178.151	213.249	NA	NA
2017-02-06	A703	Playa	Edroy	177.528	218.04	252.051	279.191	318.363	357.536
2017-02-06	A704	Playa	Edroy	163.46	198.894	231.447	257.633	292.041	326.449
2017-02-06	A300	Playa	Edroy	191.207	230.723	268.946	NA	NA	NA
2017-02-06	A301	Playa	Edroy	199.986	239.922	274.909	310.042	NA	NA
2017-02-06	A302	Playa	Edroy	149.403	186.874	223.815	258.276	NA	NA
2017-02-17	A60	Drainage-Woodland	Clareville	149.394	186.825	226.844	NA	NA	NA
2017-02-17	A61	Drainage-Woodland	Clareville	128.383	155.896	182.128	209.131	NA	NA
2017-02-17	A62	Drainage-Woodland	Clareville	144.835	176.318	206.162	233.285	NA	NA
2017-02-17	A63	Drainage-Woodland	Clareville	164.817	202.692	NA	NA	NA	NA
2017-02-17	A64	Drainage-Woodland	Clareville	147.48	177.481	203.798	230.474	259.274	NA
2017-02-17	A65	Drainage-Woodland	Clareville	159.482	191.563	222.977	252.02	NA	NA
2017-02-17	A33	Intercanopy	Miguel	128.695	160.067	NA	NA	NA	NA
2017-02-17	A16	Intercanopy	Miguel	179.746	215.192	NA	NA	NA	NA
2017-02-17	A10	Intercanopy	Miguel	157.017	192.735	226.163	NA	NA	NA
2017-02-17	A8	Intercanopy	Miguel	148.5	185.176	216.186	NA	NA	NA
2017-02-17	A11	Intercanopy	Miguel	149.001	184.619	215.779	NA	NA	NA
2017-02-17	A9	Intercanopy	Miguel	143.788	179.949	211.864	242.265	NA	NA
2017-02-17	A21	Intercanopy	Miguel	149.833	186.12	219.089	NA	NA	NA
2017-02-17	A22	Intercanopy	Miguel	147.918	184.221	218.923	NA	NA	NA
2017-02-17	A19	Intercanopy	Miguel	152.81	186.256	219.207	NA	NA	NA
2017-02-17	A18	Intercanopy	Miguel	156.403	193.956	230.415	262.256	NA	NA
2017-02-17	A2	Intercanopy	Miguel	NA	NA	NA	NA	NA	NA
2017-02-17	A1	Intercanopy	Miguel	152.91	181.893	NA	NA	NA	NA
2017-02-17	A4	Intercanopy	Miguel	156.678	184.678	NA	NA	NA	NA
2017-02-17	A5	Intercanopy	Miguel	NA	NA	NA	NA	NA	NA
2017-02-17	A3	Intercanopy	Miguel	153.105	NA	NA	NA	NA	NA
2017-02-17	A6	Intercanopy	Miguel	161.85	189.85	NA	NA	NA	NA
2017-02-17	A29	Grove	Saspamco	136.616	166.487	195.714	225.062	253.587	NA
2017-02-17	A17	Grove	Saspamco	141.868	173.16	201.487	228.623	NA	NA
2017-02-17	A14	Cluster	Miguel	140.953	174.44	211.088	241.666	268.477	295.725
2017-02-17	A12	Cluster	Miguel	150.293	190.941	225.414	254.96	287.751	NA
2017-02-17	A13	Cluster	Miguel	NA	NA	NA	NA	NA	NA
2017-02-17	A15	Cluster	Miguel	NA	NA	NA	NA	NA	NA
2017-02-17	A23	Grove	Saspamco	NA	NA	NA	NA	NA	NA
2017-02-17	A25	Cluster	Miguel	170.509	209.672	246.063	NA	NA	NA
2017-02-17	A28	Cluster	Miguel	160.578	NA	NA	NA	NA	NA
2017-02-17	A24	Cluster	Miguel	152.775	184.955	212.71	NA	NA	NA
2017-02-17	A7	Grove	Saspamco	134.161	163.161	NA	NA	NA	NA
2017-02-17	A27	Grove	Saspamco	148.081	185.781	NA	NA	NA	NA
2017-02-17	A30	Grove	Saspamco	128.695	160.067	NA	NA	NA	NA
2017-02-17	A26	Grove	Saspamco	141.071	174.488	202.541	230.91	NA	NA
2017-02-17	A32	Cluster	Saspamco	107.406	129.717	152.723	176.811	201.005	225.287
2017-02-17	A34	Intercanopy	Miguel	163.478	198.801	226.411	251.788	276.269	300.366
2017-02-17	A31	Grove	Saspamco	109.453	131.305	154.853	179.153	202.495	225.246
2017-02-17	A35	Cluster	Miguel	178.849	214.765	247.107	277.824	305.618	332.158
2017-02-17	A100	Playa	Edroy	NA	NA	NA	NA	NA	NA
2017-02-17	A101	Playa	Edroy	198.998	237.96	276.467	313.859	351.646	351.646
2017-02-17	A102	Playa	Edroy	197.685	238.13	277.967	316.679	356.791	356.791
2017-02-17	A700	Playa	Edroy	NA	NA	NA	NA	NA	NA
2017-02-17	A701	Playa	Edroy	169.672	205.334	234.96	259.858	284.609	284.609
2017-02-17	A702	Playa	Edroy	172.839	209.742	245.513	281.099	NA	NA
2017-02-17	A703	Playa	Edroy	191.577	230.113	265.697	293.898	329.765	329.765
2017-02-17	A704	Playa	Edroy	193.201	230.781	258.619	286.431	320.834	320.834
2017-02-17	A300	Playa	Edroy	NA	NA	NA	NA	NA	NA
2017-02-17	A301	Playa	Edroy	NA	NA	NA	NA	NA	NA
2017-02-17	A302	Playa	Edroy	NA	NA	NA	NA	NA	NA
2017-03-16	A60	Drainage-Woodland	Clareville	220.215	266.894	NA	NA	NA	NA
2017-03-16	A61	Drainage-Woodland	Clareville	180.948	214.673	248.344	NA	NA	NA
2017-03-16	A62	Drainage-Woodland	Clareville	201.473	240.679	278.437	NA	NA	NA
2017-03-16	A63	Drainage-Woodland	Clareville	226.852	274.531	NA	NA	NA	NA
2017-03-16	A64	Drainage-Woodland	Clareville	212.959	251.825	285.295	NA	NA	NA
2017-03-16	A65	Drainage-Woodland	Clareville	218.259	264.405	305.075	NA	NA	NA
2017-03-16	A33	Intercanopy	Miguel	232.912	270.912	NA	NA	NA	NA
2017-03-16	A16	Intercanopy	Miguel	214.523	253.703	284.703	312.703	339.703	366.703
2017-03-16	A10	Intercanopy	Miguel	200.671	240.185	277.56	305.56	332.56	359.56
2017-03-16	A8	Intercanopy	Miguel	186.351	230.797	268.516	296.516	323.516	350.516
2017-03-16	A11	Intercanopy	Miguel	180.263	221.617	258.65	286.65	313.65	340.65
2017-03-16	A9	Intercanopy	Miguel	181.829	221.716	258.91	293.196	320.196	347.196
2017-03-16	A21	Intercanopy	Miguel	185.983	226.248	263.554	291.554	318.554	345.554
2017-03-16	A22	Intercanopy	Miguel	175.656	216.064	254.64	282.64	309.64	336.64
2017-03-16	A19	Intercanopy	Miguel	187.058	224.207	262.401	290.401	317.401	344.401
2017-03-16	A18	Intercanopy	Miguel	202.282	244.042	284.648	320.392	347.392	374.392
2017-03-16	A2	Intercanopy	Miguel	NA	NA	NA	NA	NA	NA
2017-03-16	A1	Intercanopy	Miguel	NA	NA	NA	NA	NA	NA
2017-03-16	A4	Intercanopy	Miguel	NA	NA	NA	NA	NA	NA
2017-03-16	A5	Intercanopy	Miguel	NA	NA	NA	NA	NA	NA
2017-03-16	A3	Intercanopy	Miguel	194.074	NA	NA	NA	NA	NA
2017-03-16	A6	Intercanopy	Miguel	197.313	228.313	NA	NA	NA	NA
2017-03-16	A29	Grove	Saspamco	NA	NA	NA	NA	NA	NA
2017-03-16	A17	Grove	Saspamco	NA	NA	NA	NA	NA	NA
2017-03-16	A14	Cluster	Miguel	NA	NA	NA	NA	NA	NA
2017-03-16	A12	Cluster	Miguel	NA	NA	NA	NA	NA	NA
2017-03-16	A13	Cluster	Miguel	NA	NA	NA	NA	NA	NA
2017-03-16	A15	Cluster	Miguel	NA	NA	NA	NA	NA	NA
2017-03-16	A23	Grove	Saspamco	NA	NA	NA	NA	NA	NA
2017-03-16	A25	Cluster	Miguel	NA	NA	NA	NA	NA	NA
2017-03-16	A28	Cluster	Miguel	NA	NA	NA	NA	NA	NA
2017-03-16	A24	Cluster	Miguel	193.958	229.193	260.032	288.032	315.032	342.032
2017-03-16	A7	Grove	Saspamco	159.664	189.664	NA	NA	NA	NA
2017-03-16	A27	Grove	Saspamco	NA	NA	NA	NA	NA	NA
2017-03-16	A30	Grove	Saspamco	NA	NA	NA	NA	NA	NA
2017-03-16	A26	Grove	Saspamco	NA	NA	NA	NA	NA	NA
2017-03-16	A32	Cluster	Saspamco	142.389	168.208	194.096	221.116	248.697	276.277
2017-03-16	A34	Intercanopy	Miguel	208.152	246.789	277.85	306.563	335.853	365.143
2017-03-16	A31	Grove	Saspamco	157.691	183.763	210.661	238.163	265.139	292.115
2017-03-16	A35	Cluster	Miguel	217.113	255.304	289.986	323.262	354.053	384.845
2017-03-16	A100	Playa	Edroy	264.692	310.078	353.837	397.02	445.411	493.801
2017-03-16	A101	Playa	Edroy	253.896	300.146	344.709	387.874	431.576	475.279
2017-03-16	A102	Playa	Edroy	244.92	292.087	337.102	383.256	428.038	472.82
2017-03-16	A700	Playa	Edroy	224.669	266.221	311.859	360.083	NA	NA
2017-03-16	A701	Playa	Edroy	226.023	269.214	306.051	337.722	367.858	397.993
2017-03-16	A702	Playa	Edroy	226.22	270.716	313.97	356.919	NA	NA
2017-03-16	A703	Playa	Edroy	261.432	310.906	354.133	388.857	431.335	473.814
2017-03-16	A704	Playa	Edroy	249.078	294.178	335.889	370.524	411.359	452.195
2017-03-16	A300	Playa	Edroy	NA	NA	NA	NA	NA	NA
2017-03-16	A301	Playa	Edroy	NA	NA	NA	NA	NA	NA
2017-03-16	A302	Playa	Edroy	NA	NA	NA	NA	NA	NA
2017-03-30	A60	Drainage-Woodland	Clareville	144.361	186.748	NA	NA	NA	NA
2017-03-30	A61	Drainage-Woodland	Clareville	132.042	156.962	180.405	NA	NA	NA
2017-03-30	A62	Drainage-Woodland	Clareville	136.49	165.98	193.894	NA	NA	NA
2017-03-30	A63	Drainage-Woodland	Clareville	161.219	198.526	NA	NA	NA	NA
2017-03-30	A64	Drainage-Woodland	Clareville	149.11	178.662	202.432	NA	NA	NA
2017-03-30	A65	Drainage-Woodland	Clareville	153.854	189.808	220.054	NA	NA	NA
2017-03-30	A33	Intercanopy	Miguel	190.569	222.569	NA	NA	NA	NA
2017-03-30	A16	Intercanopy	Miguel	165.284	198.275	223.275	246.275	267.275	288.275
2017-03-30	A10	Intercanopy	Miguel	148.635	181.742	213.965	236.965	257.965	278.965
2017-03-30	A8	Intercanopy	Miguel	157.978	194.263	224.326	247.326	268.326	289.326
2017-03-30	A11	Intercanopy	Miguel	144.519	177.655	206.485	229.485	250.485	271.485
2017-03-30	A9	Intercanopy	Miguel	131.163	165.488	194.705	222.082	243.082	264.082
2017-03-30	A21	Intercanopy	Miguel	145.17	180.71	212.468	235.468	256.468	277.468
2017-03-30	A22	Intercanopy	Miguel	134.162	168.994	201.195	224.195	245.195	266.195
2017-03-30	A19	Intercanopy	Miguel	146.161	177.506	208.91	231.91	252.91	273.91
2017-03-30	A18	Intercanopy	Miguel	143.405	178.97	213.869	236.869	257.869	278.869
2017-03-30	A2	Intercanopy	Miguel	NA	NA	NA	NA	NA	NA
2017-03-30	A1	Intercanopy	Miguel	NA	NA	NA	NA	NA	NA
2017-03-30	A4	Intercanopy	Miguel	NA	NA	NA	NA	NA	NA
2017-03-30	A5	Intercanopy	Miguel	139.609	171.609	NA	NA	NA	NA
2017-03-30	A3	Intercanopy	Miguel	141.568	NA	NA	NA	NA	NA
2017-03-30	A6	Intercanopy	Miguel	155.46	187.46	NA	NA	NA	NA
2017-03-30	A29	Grove	Saspamco	133.931	163.42	192.358	220.536	248.245	275.954
2017-03-30	A17	Grove	Saspamco	135.462	164.486	189.546	214.01	235.01	256.01
2017-03-30	A14	Cluster	Miguel	139.083	175.744	205.975	231.478	257.968	284.459
2017-03-30	A12	Cluster	Miguel	138.033	174.403	205.002	230.915	251.915	272.915
2017-03-30	A13	Cluster	Miguel	138.83	177.737	210.438	239.305	260.305	281.305
2017-03-30	A15	Cluster	Miguel	NA	NA	NA	NA	NA	NA
2017-03-30	A23	Grove	Saspamco	133.89	165.283	185.283	204.283	225.283	246.283
2017-03-30	A25	Cluster	Miguel	160.191	197.809	232.928	255.928	276.928	297.928
2017-03-30	A28	Cluster	Miguel	153.575	NA	NA	NA	NA	NA
2017-03-30	A24	Cluster	Miguel	142.235	171.661	196.028	219.028	240.028	261.028
2017-03-30	A7	Grove	Saspamco	106.147	128.147	NA	NA	NA	NA
2017-03-30	A27	Grove	Saspamco	150.028	188.004	208.004	227.004	248.004	269.004
2017-03-30	A30	Grove	Saspamco	119.082	149.435	169.435	188.435	209.435	230.435
2017-03-30	A26	Grove	Saspamco	136.557	170.186	197.928	225.454	246.454	267.454
2017-03-30	A32	Cluster	Saspamco	94.4088	112.931	131.743	151.61	172.833	192.856
2017-03-30	A34	Intercanopy	Miguel	167.631	201.069	225.805	249.576	272.128	294.517
2017-03-30	A31	Grove	Saspamco	91.8309	109.582	129.337	150.511	171.015	187.625
2017-03-30	A35	Cluster	Miguel	NA	NA	NA	NA	NA	NA
2017-03-30	A100	Playa	Edroy	215.113	253.893	291.249	327.631	368.319	409.006
2017-03-30	A101	Playa	Edroy	185.189	223.624	263.208	301.259	340.09	378.921
2017-03-30	A102	Playa	Edroy	195.361	235.127	274.923	314.481	352.7	390.919
2017-03-30	A700	Playa	Edroy	115.248	150.461	189.367	230.49	NA	NA
2017-03-30	A701	Playa	Edroy	107.292	143.848	173.218	197.204	220.621	244.038
2017-03-30	A702	Playa	Edroy	110.47	148.167	185.013	221.705	NA	NA
2017-03-30	A703	Playa	Edroy	157.733	196.125	232.331	259.782	298.1	336.417
2017-03-30	A704	Playa	Edroy	179.748	218.246	254.15	281.832	318.073	354.315
2017-03-30	A300	Playa	Edroy	189.006	226.912	264.377	NA	NA	NA
2017-03-30	A301	Playa	Edroy	190.961	229.113	267.47	302.922	NA	NA
2017-03-30	A302	Playa	Edroy	170.627	210.706	250.53	287.98	NA	NA
2017-04-17	A60	Drainage-Woodland	Clareville	127.632	163.025	NA	NA	NA	NA
2017-04-17	A61	Drainage-Woodland	Clareville	110.868	136.808	159.84	NA	NA	NA
2017-04-17	A62	Drainage-Woodland	Clareville	127.583	155.706	181.98	NA	NA	NA
2017-04-17	A63	Drainage-Woodland	Clareville	151.104	186.402	NA	NA	NA	NA
2017-04-17	A64	Drainage-Woodland	Clareville	147.572	175.204	200.034	NA	NA	NA
2017-04-17	A65	Drainage-Woodland	Clareville	153.492	189.394	218.015	NA	NA	NA
2017-04-17	A33	Intercanopy	Miguel	224.711	259.711	NA	NA	NA	NA
2017-04-17	A16	Intercanopy	Miguel	180.723	219.485	248.485	275.485	299.485	323.485
2017-04-17	A10	Intercanopy	Miguel	NA	NA	NA	NA	NA	NA
2017-04-17	A8	Intercanopy	Miguel	167.578	210.236	245.509	272.509	296.509	320.509
2017-04-17	A11	Intercanopy	Miguel	160.197	201.165	236.794	263.794	287.794	311.794
2017-04-17	A9	Intercanopy	Miguel	148.56	188.228	222.643	257.219	281.219	305.219
2017-04-17	A21	Intercanopy	Miguel	161.826	202.509	239.078	266.078	290.078	314.078
2017-04-17	A22	Intercanopy	Miguel	154.359	194.122	231.342	258.342	282.342	306.342
2017-04-17	A19	Intercanopy	Miguel	166.689	202.977	238.116	265.116	289.116	313.116
2017-04-17	A18	Intercanopy	Miguel	164.106	205.027	245.622	272.622	296.622	320.622
2017-04-17	A2	Intercanopy	Miguel	NA	NA	NA	NA	NA	NA
2017-04-17	A1	Intercanopy	Miguel	166.914	199.914	231.914	NA	NA	NA
2017-04-17	A4	Intercanopy	Miguel	174.906	207.906	239.906	NA	NA	NA
2017-04-17	A5	Intercanopy	Miguel	154.593	187.593	219.593	NA	NA	NA
2017-04-17	A3	Intercanopy	Miguel	NA	NA	NA	NA	NA	NA
2017-04-17	A6	Intercanopy	Miguel	170.009	203.009	235.009	NA	NA	NA
2017-04-17	A29	Grove	Saspamco	155.013	190.46	223.484	255.836	287.105	318.374
2017-04-17	A17	Grove	Saspamco	149.123	182.022	211.293	238.921	262.921	286.921
2017-04-17	A14	Cluster	Miguel	149.578	191.513	225.469	254.788	281.935	309.082
2017-04-17	A12	Cluster	Miguel	143.719	185.554	220.182	249.799	273.799	297.799
2017-04-17	A13	Cluster	Miguel	166.546	212.017	248.435	280.982	304.982	328.982
2017-04-17	A15	Cluster	Miguel	NA	NA	NA	NA	NA	NA
2017-04-17	A23	Grove	Saspamco	140.915	176.279	205.279	232.279	256.279	280.279
2017-04-17	A25	Cluster	Miguel	177.793	221.669	263.201	290.201	314.201	338.201
2017-04-17	A28	Cluster	Miguel	167.049	NA	NA	NA	NA	NA
2017-04-17	A24	Cluster	Miguel	168.678	203.102	232.074	259.074	283.074	307.074
2017-04-17	A7	Grove	Saspamco	121.49	146.49	NA	NA	NA	NA
2017-04-17	A27	Grove	Saspamco	160.747	204.385	233.385	260.385	284.385	308.385
2017-04-17	A30	Grove	Saspamco	137.812	172.275	201.275	228.275	252.275	276.275
2017-04-17	A26	Grove	Saspamco	154.06	192.094	221.204	251.905	275.905	299.905
2017-04-17	A32	Cluster	Saspamco	115.877	139.496	163.519	189.162	215.026	240.891
2017-04-17	A34	Intercanopy	Miguel	164.877	204.346	235.082	262.407	288.535	314.664
2017-04-17	A31	Grove	Saspamco	103.894	126.013	151.34	177.226	201.357	225.487
2017-04-17	A35	Cluster	Miguel	184.723	221.396	254.342	285.65	316.351	347.052
2017-04-17	A100	Playa	Edroy	149.861	186.581	222.274	256.853	297.972	339.091
2017-04-17	A101	Playa	Edroy	182.854	218.338	253.981	287.522	325.987	364.452
2017-04-17	A102	Playa	Edroy	186.099	224.324	261.964	297.858	336.939	376.02
2017-04-17	A700	Playa	Edroy	91.4183	125.031	162.751	203.364	NA	NA
2017-04-17	A701	Playa	Edroy	86.8997	122.292	149.944	173.005	195.953	218.901
2017-04-17	A702	Playa	Edroy	100.312	136.967	172.329	207.87	NA	NA
2017-04-17	A703	Playa	Edroy	132.008	168.462	202.238	228.897	265.123	301.348
2017-04-17	A704	Playa	Edroy	161.457	198.359	231.801	258.532	294.073	329.614
2017-04-17	A300	Playa	Edroy	173.65	210.564	246.451	NA	NA	NA
2017-04-17	A301	Playa	Edroy	166.828	204.301	240.88	274.945	NA	NA
2017-04-17	A302	Playa	Edroy	154.103	193.754	231.915	269.608	NA	NA
2017-04-27	A60	Drainage-Woodland	Clareville	133.975	171.45	NA	NA	NA	NA
2017-04-27	A61	Drainage-Woodland	Clareville	118.881	142.847	165.983	NA	NA	NA
2017-04-27	A62	Drainage-Woodland	Clareville	127.328	156.231	184.897	NA	NA	NA
2017-04-27	A63	Drainage-Woodland	Clareville	149.973	188.596	NA	NA	NA	NA
2017-04-27	A64	Drainage-Woodland	Clareville	145.209	175.322	204.346	NA	NA	NA
2017-04-27	A65	Drainage-Woodland	Clareville	141.978	177.861	208.387	NA	NA	NA
2017-04-27	A33	Intercanopy	Miguel	185.221	215.221	NA	NA	NA	NA
2017-04-27	A16	Intercanopy	Miguel	155.063	189.775	215.775	240.775	261.775	282.775
2017-04-27	A10	Intercanopy	Miguel	148.593	183.301	217.243	242.243	263.243	284.243
2017-04-27	A8	Intercanopy	Miguel	NA	NA	NA	NA	NA	NA
2017-04-27	A11	Intercanopy	Miguel	140.928	177.075	206.823	231.823	252.823	273.823
2017-04-27	A9	Intercanopy	Miguel	NA	NA	NA	NA	NA	NA
2017-04-27	A21	Intercanopy	Miguel	145.091	181.493	214.11	239.11	260.11	281.11
2017-04-27	A22	Intercanopy	Miguel	142.803	179.48	214.055	239.055	260.055	281.055
2017-04-27	A19	Intercanopy	Miguel	149.894	182.767	214.932	239.932	260.932	281.932
2017-04-27	A18	Intercanopy	Miguel	144.969	181.965	217.99	242.99	263.99	284.99
2017-04-27	A2	Intercanopy	Miguel	NA	NA	NA	NA	NA	NA
2017-04-27	A1	Intercanopy	Miguel	143.42	173.42	199.42	NA	NA	NA
2017-04-27	A4	Intercanopy	Miguel	149.084	179.084	205.084	NA	NA	NA
2017-04-27	A5	Intercanopy	Miguel	132.949	162.949	188.949	NA	NA	NA
2017-04-27	A3	Intercanopy	Miguel	127.615	NA	NA	NA	NA	NA
2017-04-27	A6	Intercanopy	Miguel	145.012	175.012	201.012	NA	NA	NA
2017-04-27	A29	Grove	Saspamco	NA	NA	NA	NA	NA	NA
2017-04-27	A17	Grove	Saspamco	132.607	162.634	188.804	214.083	235.083	256.083
2017-04-27	A14	Cluster	Miguel	129.278	167.858	198.446	225.065	250.831	276.597
2017-04-27	A12	Cluster	Miguel	NA	NA	NA	NA	NA	NA
2017-04-27	A13	Cluster	Miguel	129.278	167.858	198.446	225.065	246.065	267.065
2017-04-27	A15	Cluster	Miguel	NA	NA	NA	NA	NA	NA
2017-04-27	A23	Grove	Saspamco	NA	NA	NA	NA	NA	NA
2017-04-27	A25	Cluster	Miguel	NA	NA	NA	NA	NA	NA
2017-04-27	A28	Cluster	Miguel	NA	NA	NA	NA	NA	NA
2017-04-27	A24	Cluster	Miguel	145.079	176.037	201.43	226.43	247.43	268.43
2017-04-27	A7	Grove	Saspamco	104.31	127.31	NA	NA	NA	NA
2017-04-27	A27	Grove	Saspamco	140.728	179.363	199.363	220.363	241.363	262.363
2017-04-27	A30	Grove	Saspamco	124.51	156.545	176.545	197.545	218.545	239.545
2017-04-27	A26	Grove	Saspamco	138.802	172	199.893	228.528	249.528	270.528
2017-04-27	A32	Cluster	Saspamco	99.4597	120.874	141.106	162.356	184.442	206.384
2017-04-27	A34	Intercanopy	Miguel	141.412	174.886	200.596	225.623	248.811	272.58
2017-04-27	A31	Grove	Saspamco	94.9355	115.772	138.956	161.624	182.45	202.095
2017-04-27	A35	Cluster	Miguel	160.908	191.709	218.634	247.026	272.395	296.887
2017-04-27	A100	Playa	Edroy	NA	NA	NA	NA	NA	NA
2017-04-27	A101	Playa	Edroy	NA	NA	NA	NA	NA	NA
2017-04-27	A102	Playa	Edroy	NA	NA	NA	NA	NA	NA
2017-04-27	A700	Playa	Edroy	161.462	200.855	244.393	291.358	NA	NA
2017-04-27	A701	Playa	Edroy	144.98	185.123	217.508	243.549	270.21	296.872
2017-04-27	A702	Playa	Edroy	162.467	204.928	245.221	286.01	NA	NA
2017-04-27	A703	Playa	Edroy	207.871	247.5	283.462	310.982	353.283	395.585
2017-04-27	A704	Playa	Edroy	230.14	272.661	309.843	340.138	379.728	419.319
2017-04-27	A300	Playa	Edroy	NA	NA	NA	NA	NA	NA
2017-04-27	A301	Playa	Edroy	NA	NA	NA	NA	NA	NA
2017-04-27	A302	Playa	Edroy	NA	NA	NA	NA	NA	NA
2017-05-08	A60	Drainage-Woodland	Clareville	123.037	153.037	NA	NA	NA	NA
2017-05-08	A61	Drainage-Woodland	Clareville	98.8816	121.165	142.07	NA	NA	NA
2017-05-08	A62	Drainage-Woodland	Clareville	122.031	148.931	174.44	NA	NA	NA
2017-05-08	A63	Drainage-Woodland	Clareville	141.705	175.954	NA	NA	NA	NA
2017-05-08	A64	Drainage-Woodland	Clareville	129.579	156.999	180.432	NA	NA	NA
2017-05-08	A65	Drainage-Woodland	Clareville	145.481	179.922	207.636	NA	NA	NA
2017-05-08	A33	Intercanopy	Miguel	175.997	202.997	NA	NA	NA	NA
2017-05-08	A16	Intercanopy	Miguel	141.758	174.118	198.118	219.118	238.118	257.118
2017-05-08	A10	Intercanopy	Miguel	143.638	176.572	207.251	228.251	247.251	266.251
2017-05-08	A8	Intercanopy	Miguel	141.076	178.192	208.442	229.442	248.442	267.442
2017-05-08	A11	Intercanopy	Miguel	134.357	167.806	197.529	218.529	237.529	256.529
2017-05-08	A9	Intercanopy	Miguel	126.594	160.127	189.921	210.921	229.921	248.921
2017-05-08	A21	Intercanopy	Miguel	136.716	173.467	204.708	225.708	244.708	263.708
2017-05-08	A22	Intercanopy	Miguel	129.059	162.96	194.009	215.009	234.009	253.009
2017-05-08	A19	Intercanopy	Miguel	133.92	165.338	196.334	217.334	236.334	255.334
2017-05-08	A18	Intercanopy	Miguel	133.95	169.351	205.171	235.338	254.338	273.338
2017-05-08	A2	Intercanopy	Miguel	NA	NA	NA	NA	NA	NA
2017-05-08	A1	Intercanopy	Miguel	149.844	179.054	203.054	224.054	243.054	262.054
2017-05-08	A4	Intercanopy	Miguel	162.818	NA	NA	NA	NA	NA
2017-05-08	A5	Intercanopy	Miguel	135.61	NA	NA	NA	NA	NA
2017-05-08	A3	Intercanopy	Miguel	110.315	NA	NA	NA	NA	NA
2017-05-08	A6	Intercanopy	Miguel	148.055	175.055	NA	NA	NA	NA
2017-05-08	A29	Grove	Saspamco	137.761	169.717	201.108	232.292	260.274	288.256
2017-05-08	A17	Grove	Saspamco	140.059	174.424	204.923	233.823	252.823	271.823
2017-05-08	A14	Cluster	Miguel	137.477	179.312	215.247	244.147	263.147	282.147
2017-05-08	A12	Cluster	Miguel	NA	NA	NA	NA	NA	NA
2017-05-08	A13	Cluster	Miguel	144.882	188.916	226.588	258.811	277.811	296.811
2017-05-08	A15	Cluster	Miguel	NA	NA	NA	NA	NA	NA
2017-05-08	A23	Grove	Saspamco	121.045	154.824	176.824	197.824	216.824	235.824
2017-05-08	A25	Cluster	Miguel	146.133	183.43	218.696	239.696	258.696	277.696
2017-05-08	A28	Cluster	Miguel	143.899	NA	NA	NA	NA	NA
2017-05-08	A24	Cluster	Miguel	130.28	159.248	183.771	204.771	223.771	242.771
2017-05-08	A7	Grove	Saspamco	106.858	130.858	NA	NA	NA	NA
2017-05-08	A27	Grove	Saspamco	145.951	187.438	209.438	230.438	249.438	268.438
2017-05-08	A30	Grove	Saspamco	126.411	160.932	182.932	203.932	222.932	241.932
2017-05-08	A26	Grove	Saspamco	148.856	186.3	216.781	246.957	265.957	284.957
2017-05-08	A32	Cluster	Saspamco	94.2069	115.744	137.773	163.521	187.097	210.424
2017-05-08	A34	Intercanopy	Miguel	137.787	174.76	202.625	228.15	254.019	285.915
2017-05-08	A31	Grove	Saspamco	77.5036	95.0242	114.354	134.979	153.988	172.997
2017-05-08	A35	Cluster	Miguel	139.512	166.683	191.134	215.34	238.931	263.89
2017-05-08	A100	Playa	Edroy	113.385	151.13	186.95	222.269	262.034	301.799
2017-05-08	A101	Playa	Edroy	140.887	175.915	210.397	245.256	281.208	317.159
2017-05-08	A102	Playa	Edroy	144.213	181.457	219.907	256.755	294.844	332.932
2017-05-08	A700	Playa	Edroy	79.7274	113.919	152.671	193.955	NA	NA
2017-05-08	A701	Playa	Edroy	56.9847	91.8812	118.97	141.694	165.176	188.659
2017-05-08	A702	Playa	Edroy	84.063	119.856	154.896	190.923	NA	NA
2017-05-08	A703	Playa	Edroy	88.3327	123.644	155.575	179.648	217.36	255.071
2017-05-08	A704	Playa	Edroy	132.402	167.042	197.123	222.617	261.735	300.852
2017-05-08	A300	Playa	Edroy	114.248	150.305	186.06	NA	NA	NA
2017-05-08	A301	Playa	Edroy	146.419	184.33	221.25	256.211	NA	NA
2017-05-08	A302	Playa	Edroy	144.213	181.457	219.907	256.755	294.844	332.932
2017-05-20	A60	Drainage-Woodland	Clareville	84.9628	106.963	NA	NA	NA	NA
2017-05-20	A61	Drainage-Woodland	Clareville	73.3572	90.1638	106.128	NA	NA	NA
2017-05-20	A62	Drainage-Woodland	Clareville	88.6382	109.239	128.296	NA	NA	NA
2017-05-20	A63	Drainage-Woodland	Clareville	107.432	133.771	NA	NA	NA	NA
2017-05-20	A64	Drainage-Woodland	Clareville	93.5678	112.932	129.098	NA	NA	NA
2017-05-20	A65	Drainage-Woodland	Clareville	105.399	130.967	151.698	NA	NA	NA
2017-05-20	A33	Intercanopy	Miguel	116.834	136.834	NA	NA	NA	NA
2017-05-20	A16	Intercanopy	Miguel	104.698	129.441	147.441	165.441	179.441	193.441
2017-05-20	A10	Intercanopy	Miguel	109.234	134.761	158.47	176.47	190.47	204.47
2017-05-20	A8	Intercanopy	Miguel	100.803	127.778	149.416	167.416	181.416	195.416
2017-05-20	A11	Intercanopy	Miguel	96.2295	121.647	142.989	160.989	174.989	188.989
2017-05-20	A9	Intercanopy	Miguel	91.3202	118.073	141.034	159.034	173.034	187.034
2017-05-20	A21	Intercanopy	Miguel	101.011	128.508	150.792	168.792	182.792	196.792
2017-05-20	A22	Intercanopy	Miguel	96.6987	123.069	146.951	164.951	178.951	192.951
2017-05-20	A19	Intercanopy	Miguel	101.292	125.212	148.588	166.588	180.588	194.588
2017-05-20	A18	Intercanopy	Miguel	99.96	127.619	153.239	171.239	185.239	199.239
2017-05-20	A2	Intercanopy	Miguel	101.205	NA	NA	NA	NA	NA
2017-05-20	A1	Intercanopy	Miguel	97.3098	116.862	134.862	152.862	166.862	180.862
2017-05-20	A4	Intercanopy	Miguel	NA	NA	NA	NA	NA	NA
2017-05-20	A5	Intercanopy	Miguel	89.9126	109.913	127.913	NA	NA	NA
2017-05-20	A3	Intercanopy	Miguel	76.9747	NA	NA	NA	NA	NA
2017-05-20	A6	Intercanopy	Miguel	96.1773	116.177	134.177	NA	NA	NA
2017-05-20	A29	Grove	Saspamco	85.5826	105.265	124.554	143.547	162.019	180.491
2017-05-20	A17	Grove	Saspamco	87.8156	109.097	127.482	144.935	158.935	172.935
2017-05-20	A14	Cluster	Miguel	85.1163	111.776	132.504	150.122	164.122	178.122
2017-05-20	A12	Cluster	Miguel	82.1273	110.261	132.727	150.727	164.727	178.727
2017-05-20	A13	Cluster	Miguel	89.1306	118.435	142.112	161.594	175.594	189.594
2017-05-20	A15	Cluster	Miguel	83.1439	111.588	135.543	156.057	170.057	184.057
2017-05-20	A23	Grove	Saspamco	77.8639	100.669	114.669	132.669	146.669	160.669
2017-05-20	A25	Cluster	Miguel	107.499	136.54	162.754	180.754	194.754	208.754
2017-05-20	A28	Cluster	Miguel	107.062	NA	NA	NA	NA	NA
2017-05-20	A24	Cluster	Miguel	100.849	123.474	142.642	160.642	174.642	188.642
2017-05-20	A7	Grove	Saspamco	70.9098	87.9098	NA	NA	NA	NA
2017-05-20	A27	Grove	Saspamco	91.5867	118.449	132.449	146.449	160.449	174.449
2017-05-20	A30	Grove	Saspamco	77.6843	99.8549	113.855	127.855	141.855	155.855
2017-05-20	A26	Grove	Saspamco	91.3955	115.046	133.368	147.368	161.368	175.368
2017-05-20	A32	Cluster	Saspamco	60.5757	74.2311	88.457	103.934	119.104	134.744
2017-05-20	A34	Intercanopy	Miguel	92.0472	116.723	134.934	151.408	167.192	182.913
2017-05-20	A31	Grove	Saspamco	54.5281	67.0974	81.3437	95.7289	109.364	122.999
2017-05-20	A35	Cluster	Miguel	96.1136	116.245	134.248	152.375	169.921	187.396
2017-05-20	A100	Playa	Edroy	NA	NA	NA	NA	NA	NA
2017-05-20	A101	Playa	Edroy	NA	NA	NA	NA	NA	154.348
2017-05-20	A102	Playa	Edroy	NA	NA	NA	NA	NA	154.054
2017-05-20	A700	Playa	Edroy	NA	NA	NA	NA	NA	NA
2017-05-20	A701	Playa	Edroy	NA	NA	NA	NA	NA	NA
2017-05-20	A702	Playa	Edroy	NA	NA	NA	NA	NA	NA
2017-05-20	A703	Playa	Edroy	NA	NA	NA	NA	NA	NA
2017-05-20	A704	Playa	Edroy	NA	NA	NA	NA	NA	NA
2017-05-20	A300	Playa	Edroy	NA	NA	NA	NA	NA	NA
2017-05-20	A301	Playa	Edroy	NA	NA	NA	NA	NA	NA
2017-05-20	A302	Playa	Edroy	NA	NA	NA	NA	NA	NA
2017-06-03	A60	Drainage-Woodland	Clareville	134.887	161.887	NA	NA	NA	NA
2017-06-03	A61	Drainage-Woodland	Clareville	156.648	182.947	205.286	NA	NA	NA
2017-06-03	A62	Drainage-Woodland	Clareville	152.163	180.131	206.484	NA	NA	NA
2017-06-03	A63	Drainage-Woodland	Clareville	158.194	192.523	NA	NA	NA	NA
2017-06-03	A64	Drainage-Woodland	Clareville	156.188	181.322	203.331	NA	NA	NA
2017-06-03	A65	Drainage-Woodland	Clareville	169.804	206.786	238.269	NA	NA	NA
2017-06-03	A33	Intercanopy	Miguel	161.464	190.464	NA	NA	NA	NA
2017-06-03	A16	Intercanopy	Miguel	193.017	228.554	252.554	274.554	295.554	316.554
2017-06-03	A10	Intercanopy	Miguel	177.929	218.237	255.537	277.537	298.537	319.537
2017-06-03	A8	Intercanopy	Miguel	163.107	204.279	236.226	258.226	279.226	300.226
2017-06-03	A11	Intercanopy	Miguel	183.744	223.021	257.749	279.749	300.749	321.749
2017-06-03	A9	Intercanopy	Miguel	152.162	191.28	224.22	246.22	267.22	288.22
2017-06-03	A21	Intercanopy	Miguel	163.176	202.91	237.121	259.121	280.121	301.121
2017-06-03	A22	Intercanopy	Miguel	171.789	213.672	249.5	271.5	292.5	313.5
2017-06-03	A19	Intercanopy	Miguel	165.234	200.369	234.836	256.836	277.836	298.836
2017-06-03	A18	Intercanopy	Miguel	176.812	216.761	256.205	278.205	299.205	320.205
2017-06-03	A2	Intercanopy	Miguel	NA	NA	NA	NA	NA	NA
2017-06-03	A1	Intercanopy	Miguel	160.715	192.119	219.119	241.119	262.119	283.119
2017-06-03	A4	Intercanopy	Miguel	173.325	204.325	231.325	NA	NA	NA
2017-06-03	A5	Intercanopy	Miguel	161.918	192.918	219.918	NA	NA	NA
2017-06-03	A3	Intercanopy	Miguel	135.577	164.577	NA	NA	NA	NA
2017-06-03	A6	Intercanopy	Miguel	161.464	190.464	217.464	NA	NA	NA
2017-06-03	A29	Grove	Saspamco	118.539	146.028	173.029	199.317	221.12	242.923
2017-06-03	A17	Grove	Saspamco	117.125	143.714	167.319	190.103	211.103	232.103
2017-06-03	A14	Cluster	Miguel	121.812	154.726	180.509	202.994	223.994	244.994
2017-06-03	A12	Cluster	Miguel	NA	NA	NA	NA	NA	NA
2017-06-03	A13	Cluster	Miguel	160.144	198.403	229.825	256.372	277.372	298.372
2017-06-03	A15	Cluster	Miguel	NA	NA	NA	NA	NA	NA
2017-06-03	A23	Grove	Saspamco	124.153	154.332	178.332	200.332	221.332	242.332
2017-06-03	A25	Cluster	Miguel	171.288	215.182	239.182	261.182	282.182	303.182
2017-06-03	A28	Cluster	Miguel	198.524	NA	NA	NA	NA	NA
2017-06-03	A24	Cluster	Miguel	195.379	228.156	256.188	278.188	299.188	320.188
2017-06-03	A7	Grove	Saspamco	134.134	157.134	NA	NA	NA	NA
2017-06-03	A27	Grove	Saspamco	135.673	170.936	190.936	212.936	233.936	254.936
2017-06-03	A30	Grove	Saspamco	119.655	148.97	168.97	190.97	211.97	232.97
2017-06-03	A26	Grove	Saspamco	156.485	187.605	212.929	235.83	256.83	277.83
2017-06-03	A32	Cluster	Saspamco	133.176	156.642	181.067	207.161	232.745	259.814
2017-06-03	A34	Intercanopy	Miguel	173.085	210.728	239.919	264.733	288.285	314.747
2017-06-03	A31	Grove	Saspamco	97.4397	114.126	133.886	155.164	173.673	192.182
2017-06-03	A35	Cluster	Miguel	156.526	186.321	214.057	241.375	270.01	296.24
2017-06-03	A100	Playa	Edroy	213.651	248.15	281.892	314.639	351.968	389.298
2017-06-03	A101	Playa	Edroy	173.34	209.199	244.965	280.105	314.042	347.98
2017-06-03	A102	Playa	Edroy	222.213	261.751	297.713	334.076	370.595	407.113
2017-06-03	A700	Playa	Edroy	NA	NA	NA	NA	NA	NA
2017-06-03	A701	Playa	Edroy	NA	NA	NA	NA	NA	NA
2017-06-03	A702	Playa	Edroy	NA	NA	NA	NA	NA	NA
2017-06-03	A703	Playa	Edroy	155.161	187.867	216.672	240.976	277.871	314.767
2017-06-03	A704	Playa	Edroy	152.736	186.195	217.045	241.91	277.904	313.898
2017-06-03	A300	Playa	Edroy	138.479	172.884	206.669	NA	NA	NA
2017-06-03	A301	Playa	Edroy	211.49	246.846	281.45	313.219	NA	NA
2017-06-03	A302	Playa	Edroy	208.558	242.717	277.11	309.582	334.756	359.93
2017-06-15	A60	Drainage-Woodland	Clareville	134.687	161.687	NA	NA	NA	NA
2017-06-15	A61	Drainage-Woodland	Clareville	132.862	160.604	183.885	NA	NA	NA
2017-06-15	A62	Drainage-Woodland	Clareville	138.634	168.498	194.568	NA	NA	NA
2017-06-15	A63	Drainage-Woodland	Clareville	158.099	193.758	NA	NA	NA	NA
2017-06-15	A64	Drainage-Woodland	Clareville	145.052	174.716	199.791	NA	NA	NA
2017-06-15	A65	Drainage-Woodland	Clareville	157.968	194.995	227.71	NA	NA	NA
2017-06-15	A33	Intercanopy	Miguel	174.141	204.141	NA	NA	NA	NA
2017-06-15	A16	Intercanopy	Miguel	162.797	196.725	221.725	242.725	262.725	282.725
2017-06-15	A10	Intercanopy	Miguel	161.187	196.558	229.96	250.96	270.96	290.96
2017-06-15	A8	Intercanopy	Miguel	145.688	182.742	213.354	234.354	254.354	274.354
2017-06-15	A11	Intercanopy	Miguel	146.946	182.177	213.071	234.071	254.071	274.071
2017-06-15	A9	Intercanopy	Miguel	NA	NA	NA	NA	NA	NA
2017-06-15	A21	Intercanopy	Miguel	148.316	186.624	218.892	239.892	259.892	279.892
2017-06-15	A22	Intercanopy	Miguel	137.189	172.553	204.534	225.534	245.534	265.534
2017-06-15	A19	Intercanopy	Miguel	149.755	183.702	216.81	237.81	257.81	277.81
2017-06-15	A18	Intercanopy	Miguel	151.032	188.903	225.846	246.846	266.846	286.846
2017-06-15	A2	Intercanopy	Miguel	NA	NA	NA	NA	NA	NA
2017-06-15	A1	Intercanopy	Miguel	140.212	169.213	194.213	215.213	235.213	255.213
2017-06-15	A4	Intercanopy	Miguel	152.665	179.665	204.665	NA	NA	NA
2017-06-15	A5	Intercanopy	Miguel	138.401	165.401	190.401	NA	NA	NA
2017-06-15	A3	Intercanopy	Miguel	126.288	NA	NA	NA	NA	NA
2017-06-15	A6	Intercanopy	Miguel	143.958	170.958	NA	NA	NA	NA
2017-06-15	A29	Grove	Saspamco	128.888	158.784	188.149	216.736	240.44	264.143
2017-06-15	A17	Grove	Saspamco	127.348	156.264	181.93	206.701	226.701	246.701
2017-06-15	A14	Cluster	Miguel	133.351	170.579	200.738	227.181	247.181	267.181
2017-06-15	A12	Cluster	Miguel	NA	NA	NA	NA	NA	NA
2017-06-15	A13	Cluster	Miguel	NA	NA	NA	NA	NA	NA
2017-06-15	A15	Cluster	Miguel	NA	NA	NA	NA	NA	NA
2017-06-15	A23	Grove	Saspamco	128.912	160.699	182.699	203.699	223.699	243.699
2017-06-15	A25	Cluster	Miguel	158.571	198.733	235.675	256.675	276.675	296.675
2017-06-15	A28	Cluster	Miguel	NA	NA	NA	NA	NA	NA
2017-06-15	A24	Cluster	Miguel	162.042	194.062	219.669	240.669	260.669	280.669
2017-06-15	A7	Grove	Saspamco	122.333	148.333	NA	NA	NA	NA
2017-06-15	A27	Grove	Saspamco	122.205	157.05	179.05	200.05	220.05	240.05
2017-06-15	A30	Grove	Saspamco	127.248	159.175	181.175	202.175	222.175	242.175
2017-06-15	A26	Grove	Saspamco	150.328	184.569	212.452	237.173	257.173	277.173
2017-06-15	A32	Cluster	Saspamco	106.865	128.823	150.901	172.58	193.664	216.945
2017-06-15	A34	Intercanopy	Miguel	152.185	186.403	213.261	238.381	262.096	286.275
2017-06-15	A31	Grove	Saspamco	97.5614	118.003	140.398	161.419	181.04	200.661
2017-06-15	A35	Cluster	Miguel	145.653	172.859	198.218	224.848	257.018	283.493
2017-06-15	A100	Playa	Edroy	169.02	206.066	241.802	277.065	317.116	357.168
2017-06-15	A101	Playa	Edroy	156.539	193.001	230.701	267.77	304.724	341.678
2017-06-15	A102	Playa	Edroy	190.008	228.146	266.864	304.594	343.704	382.813
2017-06-15	A700	Playa	Edroy	94.8404	129.884	168.96	211.378	NA	NA
2017-06-15	A701	Playa	Edroy	93.2509	129.044	157.532	181.308	205.519	229.729
2017-06-15	A702	Playa	Edroy	100.751	137.731	173.675	210.901	NA	NA
2017-06-15	A703	Playa	Edroy	144.417	180.272	212.775	236.913	276.614	316.316
2017-06-15	A704	Playa	Edroy	164.599	202.16	235.121	261.614	300.478	339.342
2017-06-15	A300	Playa	Edroy	184.781	223.483	261.851	NA	NA	NA
2017-06-15	A301	Playa	Edroy	176.05	213.3	249.781	283.422	NA	NA
2017-06-15	A302	Playa	Edroy	168.752	205.575	241.998	278.08	NA	NA
2017-07-04	A60	Drainage-Woodland	Clareville	147.123	NA	NA	NA	NA	NA
2017-07-04	A61	Drainage-Woodland	Clareville	132.059	159.092	184.365	NA	NA	NA
2017-07-04	A62	Drainage-Woodland	Clareville	145.145	176.63	206.085	NA	NA	NA
2017-07-04	A63	Drainage-Woodland	Clareville	175.268	216.225	NA	NA	NA	NA
2017-07-04	A64	Drainage-Woodland	Clareville	161.763	192.361	220.699	NA	NA	NA
2017-07-04	A65	Drainage-Woodland	Clareville	166.985	206.153	238.922	NA	NA	NA
2017-07-04	A33	Intercanopy	Miguel	183.925	217.925	NA	NA	NA	NA
2017-07-04	A16	Intercanopy	Miguel	172.194	208.807	237.807	264.807	289.807	314.807
2017-07-04	A10	Intercanopy	Miguel	165.5	206.269	244.281	271.281	296.281	321.281
2017-07-04	A8	Intercanopy	Miguel	NA	NA	NA	NA	NA	NA
2017-07-04	A11	Intercanopy	Miguel	162.126	202.348	237.475	264.475	289.475	314.475
2017-07-04	A9	Intercanopy	Miguel	144.837	184.095	217.66	244.66	269.66	294.66
2017-07-04	A21	Intercanopy	Miguel	166.454	209.334	245.604	272.604	297.604	322.604
2017-07-04	A22	Intercanopy	Miguel	150.509	189.955	225.96	252.96	277.96	302.96
2017-07-04	A19	Intercanopy	Miguel	161.472	196.556	231.97	258.97	283.97	308.97
2017-07-04	A18	Intercanopy	Miguel	155.316	196.128	235.215	262.215	287.215	312.215
2017-07-04	A2	Intercanopy	Miguel	NA	NA	NA	NA	NA	NA
2017-07-04	A1	Intercanopy	Miguel	157.495	189.998	218.998	245.998	270.998	295.998
2017-07-04	A4	Intercanopy	Miguel	165.268	197.268	226.268	NA	NA	NA
2017-07-04	A5	Intercanopy	Miguel	142.205	174.205	203.205	NA	NA	NA
2017-07-04	A3	Intercanopy	Miguel	127.128	NA	NA	NA	NA	NA
2017-07-04	A6	Intercanopy	Miguel	156.579	188.579	NA	NA	NA	NA
2017-07-04	A29	Grove	Saspamco	143.51	176.022	207.767	239.47	270.3	301.129
2017-07-04	A17	Grove	Saspamco	142.059	175.487	203.829	231.191	256.191	281.191
2017-07-04	A14	Cluster	Miguel	146.096	187.901	221.345	250.373	275.373	300.373
2017-07-04	A12	Cluster	Miguel	NA	NA	NA	NA	NA	NA
2017-07-04	A13	Cluster	Miguel	164.545	210.237	248.253	280.761	305.761	330.761
2017-07-04	A15	Cluster	Miguel	NA	NA	NA	NA	NA	NA
2017-07-04	A23	Grove	Saspamco	136.34	173.706	196.706	223.706	248.706	273.706
2017-07-04	A25	Cluster	Miguel	169.314	211.478	248.472	275.472	300.472	325.472
2017-07-04	A28	Cluster	Miguel	171.385	NA	NA	NA	NA	NA
2017-07-04	A24	Cluster	Miguel	157.478	191.111	219.753	246.753	271.753	296.753
2017-07-04	A7	Grove	Saspamco	117.475	143.475	NA	NA	NA	NA
2017-07-04	A27	Grove	Saspamco	154.627	197.249	220.249	247.249	272.249	297.249
2017-07-04	A30	Grove	Saspamco	135.912	171.51	194.51	221.51	246.51	271.51
2017-07-04	A26	Grove	Saspamco	156.356	193.722	224.487	251.487	276.487	301.487
2017-07-04	A32	Cluster	Saspamco	104.574	129.937	154.641	179.118	205.2	231.526
2017-07-04	A34	Intercanopy	Miguel	156.711	194.951	224.881	252.86	277.649	304.571
2017-07-04	A31	Grove	Saspamco	95.4989	117.562	140.155	163.284	185.539	207.795
2017-07-04	A35	Cluster	Miguel	156.968	189.043	218.653	247.663	274.054	300.727
2017-07-04	A100	Playa	Edroy	187.132	228.034	267.795	306.859	351.229	395.598
2017-07-04	A101	Playa	Edroy	232.296	271.94	313.821	353.108	393.476	433.845
2017-07-04	A102	Playa	Edroy	232.823	275.607	318.103	360.143	403.475	446.806
2017-07-04	A700	Playa	Edroy	153.272	192.572	235.71	282.448	NA	NA
2017-07-04	A701	Playa	Edroy	144.44	184.382	215.998	242.454	269.126	295.798
2017-07-04	A702	Playa	Edroy	157.813	199.366	239.734	280.654	NA	NA
2017-07-04	A703	Playa	Edroy	130.928	167.463	199.45	226.053	270.056	314.06
2017-07-04	A704	Playa	Edroy	233.073	274.708	311.006	340.478	383.465	426.452
2017-07-04	A300	Playa	Edroy	197.783	240.697	281.169	NA	NA	NA
2017-07-04	A301	Playa	Edroy	213.239	256.33	297.232	334.646	NA	NA
2017-07-04	A302	Playa	Edroy	201.045	241.788	282.415	323.481	NA	NA
2017-07-20	A60	Drainage-Woodland	Clareville	136.109	NA	NA	NA	NA	NA
2017-07-20	A61	Drainage-Woodland	Clareville	124.034	150.938	176.872	NA	NA	NA
2017-07-20	A62	Drainage-Woodland	Clareville	140.429	170.752	199.947	NA	NA	NA
2017-07-20	A63	Drainage-Woodland	Clareville	160.463	197.503	NA	NA	NA	NA
2017-07-20	A64	Drainage-Woodland	Clareville	146.002	175.594	201.72	NA	NA	NA
2017-07-20	A65	Drainage-Woodland	Clareville	158.103	194.306	225.745	NA	NA	NA
2017-07-20	A33	Intercanopy	Miguel	161.677	193.677	NA	NA	NA	NA
2017-07-20	A16	Intercanopy	Miguel	156.718	191.559	228.104	253.104	278.104	303.104
2017-07-20	A10	Intercanopy	Miguel	162.09	198.844	232.969	257.969	282.969	307.969
2017-07-20	A8	Intercanopy	Miguel	NA	NA	NA	NA	NA	NA
2017-07-20	A11	Intercanopy	Miguel	147.968	184.594	216.737	241.737	266.737	291.737
2017-07-20	A9	Intercanopy	Miguel	147.082	184.312	217.541	242.541	267.541	292.541
2017-07-20	A21	Intercanopy	Miguel	153.565	191.334	224.172	249.172	274.172	299.172
2017-07-20	A22	Intercanopy	Miguel	149.239	186.475	220.816	245.816	270.816	295.816
2017-07-20	A19	Intercanopy	Miguel	154.257	188.923	223.292	248.292	273.292	298.292
2017-07-20	A18	Intercanopy	Miguel	153.127	191.487	228.348	253.348	278.348	303.348
2017-07-20	A2	Intercanopy	Miguel	NA	NA	NA	NA	NA	NA
2017-07-20	A1	Intercanopy	Miguel	161.786	191.484	218.484	243.484	268.484	293.484
2017-07-20	A4	Intercanopy	Miguel	153.415	184.415	211.415	NA	NA	NA
2017-07-20	A5	Intercanopy	Miguel	141.738	170.738	197.738	NA	NA	NA
2017-07-20	A3	Intercanopy	Miguel	128.27	NA	NA	NA	NA	NA
2017-07-20	A6	Intercanopy	Miguel	148.099	178.099	NA	NA	NA	NA
2017-07-20	A29	Grove	Saspamco	137.615	167.551	196.895	225.792	254.04	282.289
2017-07-20	A17	Grove	Saspamco	141.105	172.369	200.99	228.76	253.76	278.76
2017-07-20	A14	Cluster	Miguel	136.604	173.846	209.195	236.733	261.733	286.733
2017-07-20	A12	Cluster	Miguel	NA	NA	NA	NA	NA	NA
2017-07-20	A13	Cluster	Miguel	140.63	180.734	214.796	244.294	269.294	294.294
2017-07-20	A15	Cluster	Miguel	NA	NA	NA	NA	NA	NA
2017-07-20	A23	Grove	Saspamco	129.538	163.875	186.875	211.875	236.875	261.875
2017-07-20	A25	Cluster	Miguel	161.37	201.176	228.176	253.176	278.176	303.176
2017-07-20	A28	Cluster	Miguel	159.056	NA	NA	NA	NA	NA
2017-07-20	A24	Cluster	Miguel	149.282	178.264	205.264	230.264	255.264	280.264
2017-07-20	A7	Grove	Saspamco	120.049	147.049	NA	NA	NA	NA
2017-07-20	A27	Grove	Saspamco	144.796	182.042	205.042	230.042	255.042	280.042
2017-07-20	A30	Grove	Saspamco	127.641	160.106	183.106	208.106	233.106	258.106
2017-07-20	A26	Grove	Saspamco	143.813	177.897	206.033	231.033	256.033	281.033
2017-07-20	A32	Cluster	Saspamco	109.408	133.271	157.205	182.446	207.501	232.525
2017-07-20	A34	Intercanopy	Miguel	143.159	177.838	205.955	232.281	257.741	283.535
2017-07-20	A31	Grove	Saspamco	NA	NA	NA	NA	NA	NA
2017-07-20	A35	Cluster	Miguel	146.208	176.216	203.67	231.518	258.627	286.14
2017-07-20	A100	Playa	Edroy	188.995	227.852	265.553	302.675	344.767	344.767
2017-07-20	A101	Playa	Edroy	199.433	237.245	274.999	312.418	351.625	351.625
2017-07-20	A102	Playa	Edroy	195.857	234.47	272.617	310.514	349.34	349.34
2017-07-20	A700	Playa	Edroy	173.869	209.438	248.342	NA	NA	NA
2017-07-20	A701	Playa	Edroy	168.627	NA	NA	NA	NA	NA
2017-07-20	A702	Playa	Edroy	174.604	212.364	249.107	NA	NA	NA
2017-07-20	A703	Playa	Edroy	183.394	220.331	253.752	281.269	322.026	322.026
2017-07-20	A704	Playa	Edroy	193.184	231.438	264.721	292.841	332.473	332.473
2017-07-20	A300	Playa	Edroy	191.587	229.581	267.516	NA	NA	NA
2017-07-20	A301	Playa	Edroy	197.473	236.717	273.136	308.77	NA	NA
2017-07-20	A302	Playa	Edroy	189.192	227.724	266.881	303.909	NA	NA
2017-08-02	A60	Drainage-Woodland	Clareville	127.618	NA	NA	NA	NA	NA
2017-08-02	A61	Drainage-Woodland	Clareville	NA	NA	NA	NA	NA	NA
2017-08-02	A62	Drainage-Woodland	Clareville	117.147	144.616	172.151	NA	NA	NA
2017-08-02	A63	Drainage-Woodland	Clareville	149.557	185.628	NA	NA	NA	NA
2017-08-02	A64	Drainage-Woodland	Clareville	140.841	169.064	193.487	NA	NA	NA
2017-08-02	A65	Drainage-Woodland	Clareville	149.068	183.881	212.35	NA	NA	NA
2017-08-02	A33	Intercanopy	Miguel	162.148	192.148	NA	NA	NA	NA
2017-08-02	A16	Intercanopy	Miguel	143.038	176.551	NA	NA	NA	NA
2017-08-02	A10	Intercanopy	Miguel	149.863	185.4	218.345	242.345	265.345	288.345
2017-08-02	A8	Intercanopy	Miguel	NA	NA	NA	NA	NA	NA
2017-08-02	A11	Intercanopy	Miguel	137.851	173.43	203.7	227.7	250.7	273.7
2017-08-02	A9	Intercanopy	Miguel	127.736	162.374	192.176	220.131	243.131	266.131
2017-08-02	A21	Intercanopy	Miguel	146.42	181.914	211.493	232.493	255.493	278.493
2017-08-02	A22	Intercanopy	Miguel	139.395	174.014	205.009	226.009	249.009	272.009
2017-08-02	A19	Intercanopy	Miguel	145.591	179.089	212.307	233.307	256.307	279.307
2017-08-02	A18	Intercanopy	Miguel	136.611	172.163	205.7	226.7	249.7	272.7
2017-08-02	A2	Intercanopy	Miguel	NA	NA	NA	NA	NA	NA
2017-08-02	A1	Intercanopy	Miguel	141.479	170.517	194.517	215.517	238.517	261.517
2017-08-02	A4	Intercanopy	Miguel	145.272	173.272	198.272	NA	NA	NA
2017-08-02	A5	Intercanopy	Miguel	131.605	156.605	181.605	NA	NA	NA
2017-08-02	A3	Intercanopy	Miguel	107.021	NA	NA	NA	NA	NA
2017-08-02	A6	Intercanopy	Miguel	137.828	165.828	NA	NA	NA	NA
2017-08-02	A29	Grove	Saspamco	130.323	159.038	187.135	214.902	241.655	268.409
2017-08-02	A17	Grove	Saspamco	123.72	153.702	181.024	207.098	230.098	253.098
2017-08-02	A14	Cluster	Miguel	124.204	160.34	189.976	214.368	237.368	260.368
2017-08-02	A12	Cluster	Miguel	117.812	154.359	183.561	207.561	230.561	253.561
2017-08-02	A13	Cluster	Miguel	NA	NA	NA	NA	NA	NA
2017-08-02	A15	Cluster	Miguel	NA	NA	NA	NA	NA	NA
2017-08-02	A23	Grove	Saspamco	111.125	141.425	165.425	189.425	212.425	235.425
2017-08-02	A25	Cluster	Miguel	142.922	179.672	203.672	227.672	250.672	273.672
2017-08-02	A28	Cluster	Miguel	145.329	NA	NA	NA	NA	NA
2017-08-02	A24	Cluster	Miguel	131.356	160.317	185.25	209.25	232.25	255.25
2017-08-02	A7	Grove	Saspamco	105.797	128.797	NA	NA	NA	NA
2017-08-02	A27	Grove	Saspamco	130.008	167.273	191.273	215.273	238.273	261.273
2017-08-02	A30	Grove	Saspamco	NA	NA	NA	NA	NA	NA
2017-08-02	A26	Grove	Saspamco	128.93	161.829	186.59	210.59	233.59	256.59
2017-08-02	A32	Cluster	Saspamco	88.8671	108.315	127.686	149.057	170.003	193.458
2017-08-02	A34	Intercanopy	Miguel	131.89	165.008	191.385	216.004	238.646	262.746
2017-08-02	A31	Grove	Saspamco	NA	NA	NA	NA	NA	NA
2017-08-02	A35	Cluster	Miguel	138.343	166.62	192.583	218.369	243.744	269.683
2017-08-02	A100	Playa	Edroy	101.222	139.838	174.932	210.097	250.397	290.697
2017-08-02	A101	Playa	Edroy	142.856	178.927	215.19	250.815	287.625	324.435
2017-08-02	A102	Playa	Edroy	157.94	196.368	233.979	271.895	310.89	349.885
2017-08-02	A700	Playa	Edroy	101.803	137.011	176.623	219.214	NA	NA
2017-08-02	A701	Playa	Edroy	77.6907	114.028	142.247	165.83	190.418	215.006
2017-08-02	A702	Playa	Edroy	90.8626	129.224	165.698	203.473	NA	NA
2017-08-02	A703	Playa	Edroy	117.605	151.987	184.193	209.817	248.315	286.814
2017-08-02	A704	Playa	Edroy	150.438	188.463	220.888	247.457	274.027	313.913
2017-08-02	A300	Playa	Edroy	130.446	165.908	201.721	NA	NA	NA
2017-08-02	A301	Playa	Edroy	137.197	174.664	211.314	246.65	NA	NA
2017-08-02	A302	Playa	Edroy	119.347	158.216	197.074	235.338	270.995	306.652
2017-08-17	A60	Drainage-Woodland	Clareville	NA	NA	NA	NA	NA	NA
2017-08-17	A61	Drainage-Woodland	Clareville	NA	NA	NA	NA	NA	NA
2017-08-17	A62	Drainage-Woodland	Clareville	NA	NA	NA	NA	NA	NA
2017-08-17	A63	Drainage-Woodland	Clareville	NA	NA	NA	NA	NA	NA
2017-08-17	A64	Drainage-Woodland	Clareville	NA	NA	NA	NA	NA	NA
2017-08-17	A65	Drainage-Woodland	Clareville	NA	NA	NA	NA	NA	NA
2017-08-17	A33	Intercanopy	Miguel	NA	NA	NA	NA	NA	NA
2017-08-17	A16	Intercanopy	Miguel	74.5404	92.2535	105.254	117.254	128.254	139.254
2017-08-17	A10	Intercanopy	Miguel	76.0925	93.1789	109.014	121.014	132.014	143.014
2017-08-17	A8	Intercanopy	Miguel	NA	NA	NA	NA	NA	NA
2017-08-17	A11	Intercanopy	Miguel	69.3882	86.4239	102.013	114.013	125.013	136.013
2017-08-17	A9	Intercanopy	Miguel	68.5526	87.4723	105.367	117.367	128.367	139.367
2017-08-17	A21	Intercanopy	Miguel	75.3506	94.6158	110.535	122.535	133.535	144.535
2017-08-17	A22	Intercanopy	Miguel	70.3194	88.712	105.515	117.515	128.515	139.515
2017-08-17	A19	Intercanopy	Miguel	75.0206	91.8182	108.823	120.823	131.823	142.823
2017-08-17	A18	Intercanopy	Miguel	75.0558	94.3445	112.647	124.647	135.647	146.647
2017-08-17	A2	Intercanopy	Miguel	NA	NA	NA	NA	NA	NA
2017-08-17	A1	Intercanopy	Miguel	69.9446	84.8308	97.8308	109.831	120.831	131.831
2017-08-17	A4	Intercanopy	Miguel	80.0088	NA	NA	NA	NA	NA
2017-08-17	A5	Intercanopy	Miguel	64.5171	NA	NA	NA	NA	NA
2017-08-17	A3	Intercanopy	Miguel	53.8281	NA	NA	NA	NA	NA
2017-08-17	A6	Intercanopy	Miguel	69.4428	NA	NA	NA	NA	NA
2017-08-17	A29	Grove	Saspamco	66.2293	81.0472	95.5995	109.594	123.742	137.89
2017-08-17	A17	Grove	Saspamco	65.8759	80.9437	94.8635	108.079	119.079	130.079
2017-08-17	A14	Cluster	Miguel	NA	NA	NA	NA	NA	NA
2017-08-17	A12	Cluster	Miguel	64.8334	83.5149	99.2289	111.229	122.229	133.229
2017-08-17	A13	Cluster	Miguel	64.4839	85.2427	101.767	115.948	126.948	137.948
2017-08-17	A15	Cluster	Miguel	NA	NA	NA	NA	NA	NA
2017-08-17	A23	Grove	Saspamco	59.525	76.3597	89.3597	101.36	112.36	123.36
2017-08-17	A25	Cluster	Miguel	76.2115	96.2812	109.281	121.281	132.281	143.281
2017-08-17	A28	Cluster	Miguel	75.5614	NA	NA	NA	NA	NA
2017-08-17	A24	Cluster	Miguel	68.6131	83.388	96.2594	108.259	119.259	130.259
2017-08-17	A7	Grove	Saspamco	52.3776	64.3776	NA	NA	NA	NA
2017-08-17	A27	Grove	Saspamco	70.0402	88.8038	101.804	113.804	124.804	135.804
2017-08-17	A30	Grove	Saspamco	61.4364	77.4354	90.4354	102.435	113.435	124.435
2017-08-17	A26	Grove	Saspamco	68.5467	85.3501	98.9536	110.954	121.954	132.954
2017-08-17	A32	Cluster	Saspamco	46.5928	57.6739	69.0186	80.8182	92.6412	104.419
2017-08-17	A34	Intercanopy	Miguel	66.0224	82.7613	96.1579	108.649	120.411	132.839
2017-08-17	A31	Grove	Saspamco	46.1516	55.3155	65.5474	75.9101	85.648	95.3859
2017-08-17	A35	Cluster	Miguel	70.2179	83.5754	95.6132	107.456	119.595	131.715
2017-08-17	A100	Playa	Edroy	NA	NA	NA	NA	NA	NA
2017-08-17	A101	Playa	Edroy	NA	NA	NA	NA	NA	NA
2017-08-17	A102	Playa	Edroy	NA	NA	NA	NA	NA	NA
2017-08-17	A700	Playa	Edroy	NA	NA	NA	NA	NA	NA
2017-08-17	A701	Playa	Edroy	NA	NA	NA	NA	NA	NA
2017-08-17	A702	Playa	Edroy	NA	NA	NA	NA	NA	NA
2017-08-17	A703	Playa	Edroy	NA	NA	NA	NA	NA	NA
2017-08-17	A704	Playa	Edroy	NA	NA	NA	NA	NA	NA
2017-08-17	A300	Playa	Edroy	NA	NA	NA	NA	NA	NA
2017-08-17	A301	Playa	Edroy	NA	NA	NA	NA	NA	NA
2017-08-17	A302	Playa	Edroy	NA	NA	NA	NA	NA	NA
2017-09-02	A60	Drainage-Woodland	Clareville	126.171	NA	NA	NA	NA	NA
2017-09-02	A61	Drainage-Woodland	Clareville	NA	NA	NA	NA	NA	NA
2017-09-02	A62	Drainage-Woodland	Clareville	134.065	163.404	191.504	NA	NA	NA
2017-09-02	A63	Drainage-Woodland	Clareville	161.952	200.364	NA	NA	NA	NA
2017-09-02	A64	Drainage-Woodland	Clareville	138.018	166.612	190.916	NA	NA	NA
2017-09-02	A65	Drainage-Woodland	Clareville	144.957	179.028	207.696	NA	NA	NA
2017-09-02	A33	Intercanopy	Miguel	162.971	190.971	NA	NA	NA	NA
2017-09-02	A16	Intercanopy	Miguel	151.233	185.327	209.327	231.327	252.327	273.327
2017-09-02	A10	Intercanopy	Miguel	157.345	193.539	226.933	248.933	269.933	290.933
2017-09-02	A8	Intercanopy	Miguel	NA	NA	NA	NA	NA	NA
2017-09-02	A11	Intercanopy	Miguel	141.45	177.3	208.045	230.045	251.045	272.045
2017-09-02	A9	Intercanopy	Miguel	131.413	166.295	196.715	218.715	239.715	260.715
2017-09-02	A21	Intercanopy	Miguel	149.356	187.804	220.147	242.147	263.147	284.147
2017-09-02	A22	Intercanopy	Miguel	148.016	186.464	218.807	240.807	261.807	282.807
2017-09-02	A19	Intercanopy	Miguel	151.104	185.057	218.646	240.646	261.646	282.646
2017-09-02	A18	Intercanopy	Miguel	142.41	178.561	212.323	234.323	255.323	276.323
2017-09-02	A2	Intercanopy	Miguel	NA	NA	NA	NA	NA	NA
2017-09-02	A1	Intercanopy	Miguel	138.696	167.145	191.145	213.145	234.145	255.145
2017-09-02	A4	Intercanopy	Miguel	147.903	172.903	195.903	NA	NA	NA
2017-09-02	A5	Intercanopy	Miguel	125.003	150.003	173.003	NA	NA	NA
2017-09-02	A3	Intercanopy	Miguel	116.882	NA	NA	NA	NA	NA
2017-09-02	A6	Intercanopy	Miguel	141.474	167.474	NA	NA	NA	NA
2017-09-02	A29	Grove	Saspamco	132.443	161.116	189.525	215.412	240.692	265.972
2017-09-02	A17	Grove	Saspamco	123.193	153.421	178.661	202.691	223.691	244.691
2017-09-02	A14	Cluster	Miguel	NA	NA	NA	NA	NA	NA
2017-09-02	A12	Cluster	Miguel	126.594	164.622	196.111	NA	NA	NA
2017-09-02	A13	Cluster	Miguel	NA	NA	NA	NA	NA	NA
2017-09-02	A15	Cluster	Miguel	127.307	166.561	200.538	230.472	251.472	272.472
2017-09-02	A23	Grove	Saspamco	118.97	152.183	176.183	198.183	219.183	240.183
2017-09-02	A25	Cluster	Miguel	156.843	194.519	218.519	240.519	261.519	282.519
2017-09-02	A28	Cluster	Miguel	152.067	NA	NA	NA	NA	NA
2017-09-02	A24	Cluster	Miguel	139.205	168.532	194.583	216.583	237.583	258.583
2017-09-02	A7	Grove	Saspamco	103.369	NA	NA	NA	NA	NA
2017-09-02	A27	Grove	Saspamco	138.955	175.917	199.917	221.917	242.917	263.917
2017-09-02	A30	Grove	Saspamco	119.538	151.658	175.658	197.658	218.658	239.658
2017-09-02	A26	Grove	Saspamco	129.27	162.271	189.02	211.02	232.02	253.02
2017-09-02	A32	Cluster	Saspamco	91.7373	111.375	131.46	153.335	176.64	200.713
2017-09-02	A34	Intercanopy	Miguel	137.141	170.17	196.636	221.61	245.577	270.089
2017-09-02	A31	Grove	Saspamco	87.796	108.355	128.384	150.761	172.28	193.798
2017-09-02	A35	Cluster	Miguel	139.37	165.21	188.965	214.989	240.222	266.195
2017-09-02	A100	Playa	Edroy	160.423	200.431	239.025	277.027	322.472	367.916
2017-09-02	A101	Playa	Edroy	190.925	230.271	271.26	312.196	353.267	394.337
2017-09-02	A102	Playa	Edroy	195.796	236.88	277.864	318.304	361.25	404.196
2017-09-02	A700	Playa	Edroy	135.763	174.422	216.897	260.526	NA	NA
2017-09-02	A701	Playa	Edroy	120.468	159.374	189.769	215.692	242.747	269.802
2017-09-02	A702	Playa	Edroy	136.216	177.218	216.538	257.626	NA	NA
2017-09-02	A703	Playa	Edroy	164.98	204.789	238.897	266.851	309.983	353.115
2017-09-02	A704	Playa	Edroy	201.373	243.01	278.358	307.164	350.685	394.206
2017-09-02	A300	Playa	Edroy	173.1	212.809	254.377	NA	NA	NA
2017-09-02	A301	Playa	Edroy	185.336	225.957	265.424	301.741	NA	NA
2017-09-02	A302	Playa	Edroy	170.519	212.804	255.534	296.994	NA	NA
2017-09-24	A60	Drainage-Woodland	Clareville	NA	NA	NA	NA	NA	NA
2017-09-24	A61	Drainage-Woodland	Clareville	NA	NA	NA	NA	NA	NA
2017-09-24	A62	Drainage-Woodland	Clareville	131.244	157.584	182.062	NA	NA	NA
2017-09-24	A63	Drainage-Woodland	Clareville	144.148	179.505	NA	NA	NA	NA
2017-09-24	A64	Drainage-Woodland	Clareville	138.331	165.55	189.044	NA	NA	NA
2017-09-24	A65	Drainage-Woodland	Clareville	154.179	186.309	215.567	NA	NA	NA
2017-09-24	A33	Intercanopy	Miguel	156.977	184.977	NA	NA	NA	NA
2017-09-24	A16	Intercanopy	Miguel	147.902	177.997	207.997	237.997	267.997	297.997
2017-09-24	A10	Intercanopy	Miguel	NA	NA	NA	NA	NA	NA
2017-09-24	A8	Intercanopy	Miguel	NA	NA	NA	NA	NA	NA
2017-09-24	A11	Intercanopy	Miguel	NA	NA	NA	NA	NA	NA
2017-09-24	A9	Intercanopy	Miguel	NA	NA	NA	NA	NA	NA
2017-09-24	A21	Intercanopy	Miguel	NA	NA	NA	NA	NA	NA
2017-09-24	A22	Intercanopy	Miguel	NA	NA	NA	NA	NA	NA
2017-09-24	A19	Intercanopy	Miguel	NA	NA	NA	NA	NA	NA
2017-09-24	A18	Intercanopy	Miguel	NA	NA	NA	NA	NA	NA
2017-09-24	A2	Intercanopy	Miguel	NA	NA	NA	NA	NA	NA
2017-09-24	A1	Intercanopy	Miguel	NA	NA	NA	NA	NA	NA
2017-09-24	A4	Intercanopy	Miguel	NA	NA	NA	NA	NA	NA
2017-09-24	A5	Intercanopy	Miguel	NA	NA	NA	NA	NA	NA
2017-09-24	A3	Intercanopy	Miguel	110.575	NA	NA	NA	NA	NA
2017-09-24	A6	Intercanopy	Miguel	NA	NA	NA	NA	NA	NA
2017-09-24	A29	Grove	Saspamco	NA	NA	NA	NA	NA	NA
2017-09-24	A17	Grove	Saspamco	NA	NA	NA	NA	NA	NA
2017-09-24	A14	Cluster	Miguel	NA	NA	NA	NA	NA	NA
2017-09-24	A12	Cluster	Miguel	NA	NA	NA	NA	NA	NA
2017-09-24	A13	Cluster	Miguel	NA	NA	NA	NA	NA	NA
2017-09-24	A15	Cluster	Miguel	NA	NA	NA	NA	NA	NA
2017-09-24	A23	Grove	Saspamco	NA	NA	NA	NA	NA	NA
2017-09-24	A25	Cluster	Miguel	NA	NA	NA	NA	NA	NA
2017-09-24	A28	Cluster	Miguel	NA	NA	NA	NA	NA	NA
2017-09-24	A24	Cluster	Miguel	143.364	172.848	198.992	228.992	258.992	288.992
2017-09-24	A7	Grove	Saspamco	119.788	145.788	NA	NA	NA	NA
2017-09-24	A27	Grove	Saspamco	NA	NA	NA	NA	NA	NA
2017-09-24	A30	Grove	Saspamco	NA	NA	NA	NA	NA	NA
2017-09-24	A26	Grove	Saspamco	NA	NA	NA	NA	NA	NA
2017-09-24	A32	Cluster	Saspamco	102.572	123.261	146.699	168.896	191.119	213.524
2017-09-24	A34	Intercanopy	Miguel	131.259	162.247	187.027	212.877	235.462	258.459
2017-09-24	A31	Grove	Saspamco	88.4507	107.647	128.751	150.062	170.507	NA
2017-09-24	A35	Cluster	Miguel	137.065	164.788	190.178	214.592	239.707	NA
2017-09-24	A100	Playa	Edroy	NA	NA	NA	NA	NA	NA
2017-09-24	A101	Playa	Edroy	NA	NA	NA	NA	NA	NA
2017-09-24	A102	Playa	Edroy	NA	NA	NA	NA	NA	NA
2017-09-24	A700	Playa	Edroy	NA	NA	NA	NA	NA	NA
2017-09-24	A701	Playa	Edroy	NA	NA	NA	NA	NA	NA
2017-09-24	A702	Playa	Edroy	NA	NA	NA	NA	NA	NA
2017-09-24	A703	Playa	Edroy	NA	NA	NA	NA	NA	NA
2017-09-24	A704	Playa	Edroy	NA	NA	NA	NA	NA	NA
2017-09-24	A300	Playa	Edroy	NA	NA	NA	NA	NA	NA
2017-09-24	A301	Playa	Edroy	NA	NA	NA	NA	NA	NA
2017-09-24	A302	Playa	Edroy	NA	NA	NA	NA	NA	NA
2018-06-28	A60	Drainage-Woodland	Clareville	210.133	252.692	NA	NA	NA	NA
2018-06-28	A61	Drainage-Woodland	Clareville	185.806	215.923	242.249	271.576	NA	NA
2018-06-28	A62	Drainage-Woodland	Clareville	215.303	259.31	293.448	321.103	NA	NA
2018-06-28	A63	Drainage-Woodland	Clareville	217.44	262.22	NA	NA	NA	NA
2018-06-28	A64	Drainage-Woodland	Clareville	212.081	243.072	272.224	299.646	331.256	NA
2018-06-28	A65	Drainage-Woodland	Clareville	209.878	249.55	283.577	NA	NA	NA
2018-06-28	A66	Drainage-Woodland	Clareville	158.85	183.521	183.521	NA	NA	NA
2018-06-28	A33	Intercanopy	Miguel	NA	NA	NA	NA	NA	NA
2018-06-28	A16	Intercanopy	Miguel	217.393	252.999	NA	NA	NA	NA
2018-06-28	A10	Intercanopy	Miguel	205.46	244.842	280.672	NA	NA	NA
2018-06-28	A8	Intercanopy	Miguel	NA	NA	NA	NA	NA	NA
2018-06-28	A11	Intercanopy	Miguel	202.385	241.996	276.516	NA	NA	NA
2018-06-28	A9	Intercanopy	Miguel	NA	NA	NA	NA	NA	NA
2018-06-28	A21	Intercanopy	Miguel	182.056	221.818	255.222	NA	NA	NA
2018-06-28	A22	Intercanopy	Miguel	217.467	261.33	297.9	NA	NA	NA
2018-06-28	A19	Intercanopy	Miguel	204.815	242.329	277.221	NA	NA	NA
2018-06-28	A18	Intercanopy	Miguel	215.832	257.376	296.797	NA	NA	NA
2018-06-28	A2	Intercanopy	Miguel	NA	NA	NA	NA	NA	NA
2018-06-28	A1	Intercanopy	Miguel	193.137	225.053	NA	NA	NA	NA
2018-06-28	A4	Intercanopy	Miguel	195.603	NA	NA	NA	NA	NA
2018-06-28	A5	Intercanopy	Miguel	NA	NA	NA	NA	NA	NA
2018-06-28	A3	Intercanopy	Miguel	186.394	NA	NA	NA	NA	NA
2018-06-28	A6	Intercanopy	Miguel	231.168	NA	NA	NA	NA	NA
2018-06-28	A29	Grove	Saspamco	NA	NA	NA	NA	NA	NA
2018-06-28	A17	Grove	Saspamco	NA	NA	NA	NA	NA	NA
2018-06-28	A14	Cluster	Miguel	NA	NA	NA	NA	NA	NA
2018-06-28	A12	Cluster	Miguel	NA	NA	NA	NA	NA	NA
2018-06-28	A13	Cluster	Miguel	NA	NA	NA	NA	NA	NA
2018-06-28	A15	Cluster	Miguel	NA	NA	NA	NA	NA	NA
2018-06-28	A23	Grove	Saspamco	188.531	225.508	NA	NA	NA	NA
2018-06-28	A25	Cluster	Miguel	220.62	262.606	302.935	NA	NA	NA
2018-06-28	A28	Cluster	Miguel	234.716	273.415	NA	NA	NA	NA
2018-06-28	A24	Cluster	Miguel	233.799	266.888	297.139	NA	NA	NA
2018-06-28	A7	Grove	Saspamco	187.904	231.904	NA	NA	NA	NA
2018-06-28	A27	Grove	Saspamco	NA	NA	NA	NA	NA	NA
2018-06-28	A30	Grove	Saspamco	168.15	210.858	NA	NA	NA	NA
2018-06-28	A26	Grove	Saspamco	222.424	272.082	306.235	336.542	NA	NA
2018-06-28	A32	Cluster	Saspamco	156.013	183.576	213.171	243.771	274.371	304.972
2018-06-28	A34	Intercanopy	Miguel	202.921	236.445	266.251	296.969	327.688	358.407
2018-06-28	A31	Grove	Saspamco	170.277	199.652	230.111	259.627	289.143	318.659
2018-06-28	A35	Cluster	Miguel	210.996	250.257	287.291	320.389	353.486	386.584

## Sheet: Infitrability (mm hr-1)
ID	Vegetation	Cover Class	Run (Wet or Dry)	Time (seconds)	Infiltration rate (mm/hour)
P1	Inter-canopy	Grazed	Wet	170	154.507
P1	Inter-canopy	Grazed	Wet	452	138.382
P1	Inter-canopy	Grazed	Wet	572	104.843
P1	Inter-canopy	Grazed	Wet	692	61.6283
P1	Inter-canopy	Grazed	Wet	812	40.3437
P1	Inter-canopy	Grazed	Wet	932	35.1838
P1	Inter-canopy	Grazed	Wet	1052	29.3789
P1	Inter-canopy	Grazed	Wet	1172	40.3437
P1	Inter-canopy	Grazed	Wet	1292	44.8587
P1	Inter-canopy	Grazed	Wet	1412	27.444
P1	Inter-canopy	Grazed	Wet	1532	31.9589
P1	Inter-canopy	Grazed	Wet	1652	41.6337
P1	Inter-canopy	Grazed	Wet	1772	54.5335
P1	Inter-canopy	Grazed	Wet	1892	64.2083
P1	Inter-canopy	Grazed	Wet	2012	70.6582
P1	Inter-canopy	Grazed	Wet	2132	66.7882
P1	Inter-canopy	Grazed	Wet	2252	66.7882
P2	Inter-canopy	Grazed	Wet	54	154.507
P2	Inter-canopy	Grazed	Wet	290	90.0078
P2	Inter-canopy	Grazed	Wet	410	73.8831
P2	Inter-canopy	Grazed	Wet	530	62.2733
P2	Inter-canopy	Grazed	Wet	650	61.6283
P2	Inter-canopy	Grazed	Wet	770	57.7584
P2	Inter-canopy	Grazed	Wet	890	53.2435
P2	Inter-canopy	Grazed	Wet	1010	48.0836
P2	Inter-canopy	Grazed	Wet	1130	55.1785
P2	Inter-canopy	Grazed	Wet	1250	51.3085
P2	Inter-canopy	Grazed	Wet	1370	42.9237
P2	Inter-canopy	Grazed	Wet	1490	53.2435
P2	Inter-canopy	Grazed	Wet	1610	50.6636
P2	Inter-canopy	Grazed	Wet	1730	54.5335
P2	Inter-canopy	Grazed	Wet	1850	38.4088
P2	Inter-canopy	Grazed	Wet	1970	54.5335
P2	Inter-canopy	Grazed	Wet	115	154.507
P3	Inter-canopy	Grazed	Wet	235	73.8831
P3	Inter-canopy	Grazed	Wet	355	62.2733
P3	Inter-canopy	Grazed	Wet	475	61.6283
P3	Inter-canopy	Grazed	Wet	595	57.7584
P3	Inter-canopy	Grazed	Wet	715	53.2435
P3	Inter-canopy	Grazed	Wet	835	48.0836
P3	Inter-canopy	Grazed	Wet	955	55.1785
P3	Inter-canopy	Grazed	Wet	1075	51.3085
P3	Inter-canopy	Grazed	Wet	1195	42.9237
P3	Inter-canopy	Grazed	Wet	1315	38.4088
P3	Inter-canopy	Grazed	Wet	1435	54.5335
P3	Inter-canopy	Grazed	Wet	1555	37.7928
P3	Inter-canopy	Grazed	Wet	1675	35.2129
P3	Inter-canopy	Grazed	Wet	1795	39.0828
P4	Inter-canopy	Grazed	Wet	135	154.507
P4	Inter-canopy	Grazed	Wet	201	129.997
P4	Inter-canopy	Grazed	Wet	321	84.8479
P4	Inter-canopy	Grazed	Wet	441	51.3085
P4	Inter-canopy	Grazed	Wet	561	40.9887
P4	Inter-canopy	Grazed	Wet	681	33.2489
P4	Inter-canopy	Grazed	Wet	801	29.3789
P4	Inter-canopy	Grazed	Wet	921	27.444
P4	Inter-canopy	Grazed	Wet	1041	33.2489
P4	Inter-canopy	Grazed	Wet	1161	33.8939
P4	Inter-canopy	Grazed	Wet	1281	31.9589
P4	Inter-canopy	Grazed	Wet	1401	31.9589
P5	Canopy	Grazed	Wet	100	135.157
P5	Canopy	Grazed	Wet	251	85.4929
P5	Canopy	Grazed	Wet	371	48.0836
P5	Canopy	Grazed	Wet	431	48.0836
P5	Canopy	Grazed	Wet	491	22.2841
P5	Canopy	Grazed	Wet	611	27.444
P5	Canopy	Grazed	Wet	731	49.3736
P5	Canopy	Grazed	Wet	791	51.3085
P5	Canopy	Grazed	Wet	851	31.9589
P5	Canopy	Grazed	Wet	911	28.734
P5	Canopy	Grazed	Wet	971	23.5741
P5	Canopy	Grazed	Wet	1031	21.6391
P5	Canopy	Grazed	Wet	1091	9.38432
P5	Canopy	Grazed	Wet	1151	25.509
LCRA_P1	Inter-canopy	Ungrazed	Wet	100	154.507
LCRA_P1	Inter-canopy	Ungrazed	Wet	349	148.057
LCRA_P1	Inter-canopy	Ungrazed	Wet	469	99.6826
LCRA_P1	Inter-canopy	Ungrazed	Wet	589	98.3927
LCRA_P1	Inter-canopy	Ungrazed	Wet	709	80.333
LCRA_P1	Inter-canopy	Ungrazed	Wet	829	78.398
LCRA_P1	Inter-canopy	Ungrazed	Wet	949	79.688
LCRA_P1	Inter-canopy	Ungrazed	Wet	1069	70.6582
LCRA_P1	Inter-canopy	Ungrazed	Wet	1189	67.4332
LCRA_P1	Inter-canopy	Ungrazed	Wet	1309	60.9834
LCRA_P1	Inter-canopy	Ungrazed	Wet	1429	57.7584
LCRA_P1	Inter-canopy	Ungrazed	Wet	1549	54.5335
LCRA_P1	Inter-canopy	Ungrazed	Wet	1669	57.7584
LCRA_P2	Inter-canopy	Ungrazed	Wet	77	135.157
LCRA_P2	Inter-canopy	Ungrazed	Wet	274	112.582
LCRA_P2	Inter-canopy	Ungrazed	Wet	394	106.133
LCRA_P2	Inter-canopy	Ungrazed	Wet	514	96.4577
LCRA_P2	Inter-canopy	Ungrazed	Wet	634	93.2328
LCRA_P2	Inter-canopy	Ungrazed	Wet	754	88.0728
LCRA_P2	Inter-canopy	Ungrazed	Wet	874	83.5579
LCRA_P2	Inter-canopy	Ungrazed	Wet	994	80.333
LCRA_P2	Inter-canopy	Ungrazed	Wet	1114	83.5579
LCRA_P2	Inter-canopy	Ungrazed	Wet	1234	83.5579
LCRA_P2	Inter-canopy	Ungrazed	Wet	1354	83.5579
LCRA_P2	Inter-canopy	Ungrazed	Wet	1474	82.9129
LCRA_P3	Canopy	Ungrazed	Wet	100	104.843
LCRA_P3	Canopy	Ungrazed	Wet	259	20.3491
LCRA_P3	Canopy	Ungrazed	Wet	379	42.9237
LCRA_P3	Canopy	Ungrazed	Wet	499	41.6337
LCRA_P3	Canopy	Ungrazed	Wet	619	39.6988
LCRA_P3	Canopy	Ungrazed	Wet	739	35.8288
LCRA_P3	Canopy	Ungrazed	Wet	859	41.6337
LCRA_P3	Canopy	Ungrazed	Wet	979	41.6337
LCRA_P3	Canopy	Ungrazed	Wet	1099	42.2787
LCRA_P3	Canopy	Ungrazed	Wet	1219	32.6039
LCRA_P3	Canopy	Ungrazed	Wet	1339	32.6039
LCRA_P3	Canopy	Ungrazed	Wet	1459	45.5036
LCRA_P3	Canopy	Ungrazed	Wet	1579	39.0538
LCRA_P4	Canopy	Ungrazed	Wet	81	154.507
LCRA_P4	Canopy	Ungrazed	Wet	240	135.157
LCRA_P4	Canopy	Ungrazed	Wet	360	136.447
LCRA_P4	Canopy	Ungrazed	Wet	480	139.027
LCRA_P4	Canopy	Ungrazed	Wet	600	139.027
LCRA_P4	Canopy	Ungrazed	Wet	720	121.612
LCRA_P4	Canopy	Ungrazed	Wet	840	119.677
LCRA_P4	Canopy	Ungrazed	Wet	960	118.387
LCRA_P4	Canopy	Ungrazed	Wet	1080	119.032
LCRA_P4	Canopy	Ungrazed	Wet	1200	119.032
LCRA_P5	Canopy	Ungrazed	Wet	0	154.507
LCRA_P5	Canopy	Ungrazed	Wet	120	154.507
LCRA_P5	Canopy	Ungrazed	Wet	240	154.507
LCRA_P5	Canopy	Ungrazed	Wet	360	154.507
LCRA_P5	Canopy	Ungrazed	Wet	480	154.507
LCRA_P5	Canopy	Ungrazed	Wet	600	154.507
LCRA_P5	Canopy	Ungrazed	Wet	720	154.507
LCRA_P5	Canopy	Ungrazed	Wet	840	154.507
LCRA_P5	Canopy	Ungrazed	Wet	960	154.507
LCRA_P5	Canopy	Ungrazed	Wet	1080	154.507
LCRA_P5	Canopy	Ungrazed	Wet	1200	154.507
LCRA_P5	Canopy	Ungrazed	Wet	1320	154.507
LCRA_P5	Canopy	Ungrazed	Wet	1440	154.507
LCRA_P5	Canopy	Ungrazed	Wet	1560	154.507
LCRA_P6	Inter-canopy	Ungrazed	Wet	60	154.507
LCRA_P6	Inter-canopy	Ungrazed	Wet	240	95.1677
LCRA_P6	Inter-canopy	Ungrazed	Wet	360	91.9428
LCRA_P6	Inter-canopy	Ungrazed	Wet	480	82.9129
LCRA_P6	Inter-canopy	Ungrazed	Wet	600	85.4929
LCRA_P6	Inter-canopy	Ungrazed	Wet	720	84.8479
LCRA_P6	Inter-canopy	Ungrazed	Wet	840	88.7178
LCRA_P6	Inter-canopy	Ungrazed	Wet	960	91.2978
LCRA_P6	Inter-canopy	Ungrazed	Wet	1080	90.0078
LCRA_P6	Inter-canopy	Ungrazed	Wet	1200	88.7178
LCRA_P6	Inter-canopy	Ungrazed	Wet	1320	86.7829

## Sheet: Field Ksat (Kfs)
Site	Cover	Kfs (mm/hour)	Log K
Ungrazed-1	Intercanopy	164.738	2.21679
Ungrazed-1	Intercanopy	66.3444	1.8218
Ungrazed-1	Intercanopy	175.659	2.24467
Ungrazed-1	Intercanopy	36.3856	1.56093
Ungrazed-1	Intercanopy	136.984	2.13667
Ungrazed-1	Intercanopy	64.3086	1.80827
Ungrazed-1	Intercanopy	283.379	2.45237
Ungrazed-1	Intercanopy	380.548	2.58041
Ungrazed-1	Intercanopy	317.717	2.50204
Ungrazed-1	Intercanopy	240.859	2.38176
Ungrazed-1	Intercanopy	252.585	2.40241
Ungrazed-1	Intercanopy	122.629	2.08859
Ungrazed-1	Intercanopy	199.371	2.29966
Ungrazed-1	Intercanopy	96.5912	1.98494
Ungrazed-1	Intercanopy	64.1981	1.80752
Ungrazed-1	Intercanopy	160.506	2.20549
Ungrazed-1	Intercanopy	25.0546	1.39889
Ungrazed-1	Intercanopy	71.2735	1.85293
Ungrazed-1	Intercanopy	52.3174	1.71865
Ungrazed-1	Intercanopy	92.2936	1.96517
Ungrazed-1	Intercanopy	137.777	2.13918
Ungrazed-1	Intercanopy	186.158	2.26988
Ungrazed-1	Intercanopy	485.55	2.68623
Ungrazed-1	Intercanopy	65.4934	1.8162
Ungrazed-1	Intercanopy	279.816	2.44687
Ungrazed-1	Intercanopy	55.949	1.74779
Ungrazed-1	Intercanopy	91.287	1.96041
Ungrazed-1	Intercanopy	91.2744	1.96035
Ungrazed-1	Intercanopy	436.152	2.63964
Ungrazed-2	Intercanopy	273.69	2.43726
Ungrazed-2	Intercanopy	200.146	2.30135
Ungrazed-2	Intercanopy	220.81	2.34402
Ungrazed-2	Intercanopy	126.073	2.10062
Ungrazed-2	Intercanopy	110.08	2.04171
Ungrazed-2	Intercanopy	128.499	2.1089
Ungrazed-2	Intercanopy	67.9216	1.83201
Ungrazed-2	Intercanopy	74.1305	1.87
Ungrazed-2	Intercanopy	74.9056	1.87451
Ungrazed-2	Intercanopy	432.826	2.63631
Ungrazed-2	Intercanopy	41.2916	1.61586
Ungrazed-2	Intercanopy	83.1665	1.91995
Ungrazed-2	Intercanopy	59.7956	1.77667
Ungrazed-2	Intercanopy	125.252	2.09778
Ungrazed-2	Intercanopy	292.797	2.46657
Ungrazed-2	Intercanopy	123.123	2.09034
Ungrazed-1	Canopy	704.295	2.84775
Ungrazed-1	Canopy	867.855	2.93845
Ungrazed-1	Canopy	649.53	2.8126
Ungrazed-1	Canopy	774.111	2.8888
Ungrazed-1	Canopy	497.34	2.69665
Ungrazed-1	Canopy	869.919	2.93948
Ungrazed-1	Canopy	723.353	2.85935
Ungrazed-1	Canopy	1654.18	3.21858
Ungrazed-1	Canopy	1653.85	3.2185
Ungrazed-1	Canopy	435.529	2.63902
Ungrazed-1	Canopy	981.13	2.99173
Ungrazed-1	Canopy	805.8	2.90623
Ungrazed-1	Canopy	434.891	2.63838
Ungrazed-1	Canopy	720.569	2.85768
Ungrazed-1	Canopy	2727.33	3.43574
Ungrazed-1	Canopy	697.008	2.84324
Ungrazed-1	Canopy	1163.45	3.06575
Ungrazed-2	Canopy	1034.78	3.01485
Ungrazed-2	Canopy	666.227	2.82362
Ungrazed-2	Canopy	1362.45	3.13432
Ungrazed-2	Canopy	1230.61	3.09012
Ungrazed-2	Canopy	743.496	2.87128
Ungrazed-2	Canopy	779.234	2.89167
Ungrazed-2	Canopy	2228.77	3.34807
Ungrazed-2	Canopy	789.382	2.89729
Ungrazed-2	Canopy	634.883	2.80269
Ungrazed-2	Canopy	473.356	2.67519
Ungrazed-2	Canopy	1678.39	3.22489
Ungrazed-2	Canopy	286.001	2.45637
Ungrazed-2	Canopy	681.034	2.83317
Ungrazed-2	Canopy	737.438	2.86773
Ungrazed-1	Edge	1934.82	3.28664
Ungrazed-1	Edge	1066.3	3.02788
Ungrazed-1	Edge	1425.61	3.154
Ungrazed-1	Edge	912.934	2.96044
Ungrazed-1	Edge	66.0712	1.82001
Ungrazed-1	Edge	337.441	2.5282
Ungrazed-1	Edge	445.948	2.64928
Ungrazed-1	Edge	1.47564	0.16898
Ungrazed-2	Edge	1240.8	3.0937
Ungrazed-2	Edge	7.893	0.897242
Ungrazed-2	Edge	116.334	2.06571
Ungrazed-2	Edge	496.887	2.69626
Ungrazed-2	Edge	905.203	2.95675
Ungrazed-2	Edge	905.575	2.95692
Grazed	Intercanopy	5.41977	0.733981
Grazed	Intercanopy	1.57938	0.198486
Grazed	Intercanopy	5.8438	0.766695
Grazed	Intercanopy	5.69788	0.755713
Grazed	Intercanopy	4.74344	0.676093
Grazed	Intercanopy	3.80424	0.580268
Grazed	Intercanopy	3.33733	0.523399
Grazed	Intercanopy	4.1375	0.616738
Grazed	Intercanopy	6.01419	0.779177
Grazed	Intercanopy	7.24916	0.860288
Grazed	Intercanopy	2.28294	0.358494
Grazed	Intercanopy	2.07944	0.317946
Grazed	Canopy	5.06148	0.704278
Grazed	Canopy	3.11792	0.493865
Grazed	Canopy	6.70563	0.82644
Grazed	Canopy	3.81778	0.581811
Grazed	Canopy	3.44106	0.536692
Grazed	Canopy	5.18949	0.715125
Grazed	Canopy	5.62603	0.750202
